# Supplementary material for: Phylogeny of Libellulidae (Odonata: Anisoptera): comparison of molecular and morphology-based phylogenies based on wing morphology and migration
Source: PeerJ. 2020 Feb 14;8:e8567. doi: 10.7717/peerj.8567 (PMC7025703; doi:10.7717/peerj.8567)
Supplement: Supplemental Information 1 — Landmark data were subjected to generalized procrustes superimposition to standardize. All standardized data were converted into a two-dimensional data format. [file peerj-08-8567-s001.xls]

## Sheet: Sheet1
Species	x1	y1	x2	y2	x3	y3	x4	y4	x5	y5	x6	y6	x7	y7	x8	y8	x9	y9	x10	y10	x11	y11	x12	y12	x13	y13	x14	y14	x15	y15	x16	y16	x17	y17	x18	y18	x19	y19	x20	y20	x21	y21	x22	y22	x23	y23	x24	y24	Centriod Size value
Crocothemis servilia 01	0.340259	0.0562823	0.0232821	0.0564017	-0.197132	0.0754076	-0.272078	0.0562823	-0.299	0.0259658	-0.305628	-0.00395997	-0.274657	-0.0308698	-0.243428	-0.0371451	-0.175506	-0.0613788	-0.0868433	-0.0744073	-0.0763435	-0.0755149	0.00143565	-0.0844961	0.119357	-0.0694553	0.230598	-0.0476666	0.355612	0.0241601	0.207275	0.0242514	0.228306	0.0203994	0.233468	-0.0266544	0.0311132	0.0408347	0.025404	0.0312287	0.00721839	0.0233472	0.00535522	0.0180721	0.0344058	0.0228882	0.0875276	0.0360266	565.637
Crocothemis servilia 02	0.338441	0.0541621	0.0212578	0.0546884	-0.196679	0.0741705	-0.274226	0.0618135	-0.305242	0.0340902	-0.312043	0.0042022	-0.28039	-0.0259529	-0.247213	-0.0397291	-0.169911	-0.0634633	-0.0779288	-0.0734462	-0.0683486	-0.0745284	0.0343618	-0.0840925	0.14193	-0.0643645	0.233363	-0.0424061	0.348704	0.0252002	0.199394	0.022825	0.2201	0.0191815	0.231642	-0.0294926	0.0297774	0.036278	0.0239272	0.0270735	0.000947595	0.0199669	-0.00223146	0.0134773	0.0287609	0.0186188	0.0816072	0.0317277	553.523
Crocothemis servilia 03	0.343429	0.0583059	0.0298428	0.0587156	-0.190929	0.0670818	-0.270827	0.0478389	-0.298391	0.0226551	-0.306169	-0.00725643	-0.283776	-0.0265841	-0.252055	-0.0349192	-0.177874	-0.0535311	-0.0863755	-0.0682555	-0.0749059	-0.0704901	0.0122792	-0.0799246	0.136539	-0.0683339	0.219676	-0.0498838	0.352204	0.0286923	0.204855	0.0190899	0.228938	0.0178885	0.227666	-0.0354738	0.0344885	0.0407557	0.0262463	0.0337318	0.000779588	0.0260022	-0.00443013	0.0164051	0.0335285	0.0223365	0.0952596	0.0351532	507.263
Crocothemis servilia 04	0.352956	0.0593692	0.0207355	0.0574013	-0.19295	0.0693484	-0.263789	0.0498825	-0.285432	0.0324201	-0.296615	0.0015489	-0.279015	-0.0267402	-0.246025	-0.0408114	-0.178029	-0.0599315	-0.0938589	-0.0710474	-0.0838445	-0.0725886	0.0154708	-0.0814414	0.131724	-0.0716725	0.233243	-0.0479822	0.363649	0.0330135	0.205492	0.0218113	0.229663	0.019252	0.228865	-0.0327532	0.0269736	0.0385495	0.0212865	0.0308173	-0.00377543	0.0209894	-0.00946252	0.0132572	0.0256574	0.0211987	0.077082	0.0361088	542.271
Crocothemis servilia 05	0.346136	0.0546191	0.0265286	0.0580755	-0.195948	0.063124	-0.267078	0.0453004	-0.290985	0.0249247	-0.300578	-0.00647149	-0.281585	-0.0268056	-0.252367	-0.0349345	-0.171848	-0.0556668	-0.0935637	-0.0678465	-0.082591	-0.0694152	-0.00238144	-0.077342	0.110483	-0.0710835	0.232409	-0.0446321	0.35547	0.032949	0.214677	0.0190746	0.234375	0.0180698	0.230855	-0.0295904	0.0322781	0.0383998	0.0251773	0.0319228	0.00333453	0.0242602	0.000152441	0.0158234	0.0339708	0.022021	0.0930781	0.0352238	551.078
Crocothemis servilia 06	0.353195	0.0530264	0.0206981	0.0568845	-0.198572	0.0695105	-0.27666	0.0490882	-0.297755	0.0259642	-0.30192	-0.00369791	-0.277856	-0.0233894	-0.24135	-0.0353089	-0.170349	-0.0531646	-0.084791	-0.0648271	-0.0741144	-0.0683161	0.0425342	-0.0729002	0.137101	-0.06953	0.226414	-0.0501988	0.361153	0.0307809	0.198116	0.0169779	0.22488	0.0163803	0.231373	-0.0353829	0.0248185	0.0368022	0.0203656	0.0314881	-0.00754369	0.021873	-0.0148527	0.0130222	0.0220462	0.0190579	0.0830705	0.0358598	557.5
Deielia phaon 01	0.358109	0.055147	0.0294694	0.0665533	-0.192367	0.0793403	-0.253762	0.055147	-0.283403	0.0219624	-0.287445	-0.00826478	-0.263386	-0.0361588	-0.237881	-0.0489019	-0.18215	-0.0656866	-0.131021	-0.0715471	-0.120196	-0.072019	-0.000338762	-0.0830351	0.124062	-0.0703241	0.219284	-0.0480962	0.373418	0.0241253	0.199687	0.0236256	0.227414	0.0202084	0.215328	-0.0307467	0.0363012	0.0437045	0.0277281	0.0361768	-0.00239446	0.0240428	-0.00636735	0.0162164	0.0385566	0.0250796	0.111354	0.043451	372.5
Deielia phaon 02	0.33212	0.0518932	0.0314314	0.0660078	-0.188847	0.0866439	-0.258617	0.0713606	-0.29957	0.02968	-0.305842	-0.00335942	-0.283227	-0.0299815	-0.255256	-0.0445771	-0.168103	-0.0736445	-0.0995251	-0.085678	-0.0817048	-0.0888087	0.0135364	-0.0886312	0.131911	-0.0691535	0.225866	-0.0473715	0.343658	0.0183242	0.205972	0.0245813	0.227597	0.0206653	0.223989	-0.0279704	0.0347168	0.0448115	0.0258428	0.037273	0.00117874	0.02547	-0.00118737	0.0166568	0.0443062	0.02334	0.0997547	0.0424682	399.316
Deielia phaon 03	0.358017	0.0518693	0.0306497	0.0633775	-0.195735	0.0765028	-0.260426	0.0621314	-0.296407	0.0308062	-0.306176	0.00343339	-0.277012	-0.0334142	-0.251748	-0.0468285	-0.181097	-0.0694449	-0.0848337	-0.0724236	-0.0735025	-0.0758885	0.0131642	-0.0797254	0.10883	-0.067019	0.227039	-0.0431447	0.362419	0.0257419	0.196137	0.0180032	0.221837	0.0172145	0.212604	-0.0305011	0.0328369	0.0391608	0.0264887	0.0333324	0.00251378	0.0223627	-0.00271635	0.0130257	0.0387617	0.0198216	0.0983554	0.0416065	427.24
Deielia phaon 04	0.346882	0.0598882	0.0247088	0.0612335	-0.191365	0.078146	-0.255977	0.0642516	-0.289891	0.0430763	-0.303339	0.0107446	-0.281024	-0.0239542	-0.254809	-0.0420123	-0.171225	-0.074379	-0.0947845	-0.0841786	-0.0781439	-0.0880786	0.0292598	-0.0876954	0.136663	-0.0684048	0.225108	-0.0461388	0.3617	0.0307741	0.194446	0.0203591	0.224916	0.0170168	0.22065	-0.0300429	0.0276096	0.0373872	0.0183017	0.0311942	-0.00228968	0.0214296	-0.00931798	0.0136663	0.0308015	0.0200629	0.0911198	0.0356541	414.909
Deielia phaon 05	0.357915	0.0570356	0.0326044	0.0677893	-0.200678	0.0831895	-0.256507	0.0664981	-0.299678	0.0253712	-0.298853	-0.0001695	-0.276333	-0.0299277	-0.242278	-0.0445603	-0.174745	-0.0686455	-0.0882697	-0.0812288	-0.0722878	-0.0842354	0.0168307	-0.0877571	0.108463	-0.0769039	0.21931	-0.0505751	0.370785	0.0204996	0.19165	0.0224092	0.220046	0.0201947	0.212228	-0.0317708	0.0347271	0.0460426	0.0272174	0.0369857	-0.00369195	0.0248252	-0.0098618	0.0161689	0.0339491	0.0258615	0.0974577	0.0429029	389.005
Deielia phaon 06	0.34928	0.0531655	0.0269936	0.0672761	-0.191686	0.0817707	-0.256364	0.0649528	-0.300339	0.0257198	-0.303402	0.00161475	-0.277281	-0.0246414	-0.24974	-0.0437224	-0.174147	-0.0718817	-0.094082	-0.0828183	-0.0788755	-0.0834827	0.0130615	-0.0882465	0.130568	-0.0714394	0.226334	-0.0460718	0.353775	0.0209617	0.197295	0.0225145	0.222019	0.0171982	0.223552	-0.0289055	0.0322091	0.0430247	0.0244369	0.0360409	-0.00238259	0.0243035	-0.00552519	0.0181083	0.0387649	0.0244729	0.0955354	0.0400854	445.739
Deielia phaon 07	0.356791	0.0657543	0.0216498	0.0591371	-0.192585	0.0848026	-0.25621	0.0704177	-0.295178	0.0319512	-0.297352	0.00648863	-0.277305	-0.0207032	-0.247279	-0.0393568	-0.162722	-0.0729821	-0.0966527	-0.082492	-0.0805761	-0.0888823	0.0070535	-0.0921043	0.108934	-0.0781269	0.224429	-0.0435601	0.366321	0.0437493	0.197887	0.0149082	0.225485	0.0170645	0.217582	-0.0324919	0.0245478	0.0369415	0.0225688	0.032149	0.000415468	0.0215389	-0.00246191	0.0118056	0.0357512	0.0191103	0.0989058	0.0348808	347.438
Deielia phaon 08	0.350966	0.0318349	0.0235304	0.0655076	-0.199144	0.0758149	-0.262922	0.061377	-0.303516	0.0225705	-0.307954	0.00134462	-0.280427	-0.0255134	-0.248658	-0.037726	-0.162348	-0.0709367	-0.0941331	-0.0801584	-0.0849462	-0.0810404	0.0652988	-0.0765948	0.135351	-0.0598687	0.225959	-0.0380806	0.35696	0.0118982	0.189224	0.0184035	0.217097	0.017309	0.216722	-0.0286312	0.0273476	0.0427802	0.0231839	0.039744	-0.00638648	0.0260032	-0.0113652	0.0173187	0.0330961	0.0248304	0.0970645	0.0418134	397.6
Deielia phaon 09	0.3577	0.0518509	0.0227585	0.0612915	-0.19465	0.0717589	-0.255076	0.0580521	-0.294395	0.0193077	-0.299274	0.00182863	-0.274908	-0.0212736	-0.246381	-0.0400744	-0.176425	-0.0619434	-0.0981575	-0.0747395	-0.0821751	-0.074472	0.00863485	-0.0781244	0.116625	-0.0687938	0.22951	-0.0429242	0.368905	0.0285284	0.19932	0.0191073	0.226639	0.0162731	0.225083	-0.0312432	0.0250007	0.0396998	0.0175897	0.032993	-0.0024423	0.0218431	-0.00560691	0.0142669	0.033338	0.0191505	0.0983866	0.0376367	423.298
Deielia phaon 10	0.347021	0.0517405	0.0386021	0.0621867	-0.193857	0.0854179	-0.258487	0.0667704	-0.299481	0.0224738	-0.300948	-0.00585172	-0.281339	-0.0280965	-0.253319	-0.040812	-0.179797	-0.0688086	-0.0982786	-0.0823222	-0.0848859	-0.0830239	0.00885381	-0.084387	0.127243	-0.0639258	0.216775	-0.0436736	0.353309	0.0281889	0.201145	0.0192899	0.222977	0.017472	0.214928	-0.0284797	0.0403327	0.040364	0.0321101	0.035455	0.00107443	0.0234564	-0.00251862	0.0148099	0.0429907	0.0223602	0.105549	0.0393954	427.408
Deielia phaon 11	0.369024	0.055029	0.0256266	0.0652086	-0.187257	0.0852291	-0.250212	0.0668945	-0.291644	0.0223259	-0.294054	-0.00108766	-0.278558	-0.0242619	-0.248034	-0.042819	-0.177688	-0.0708048	-0.0990606	-0.0850633	-0.0799464	-0.0870404	0.00677275	-0.089954	0.114473	-0.0747996	0.223007	-0.0468026	0.369075	0.0347397	0.187719	0.0198029	0.217128	0.0185768	0.214722	-0.0326833	0.0302528	0.042159	0.0242898	0.0367307	-0.0035707	0.0249253	-0.0068748	0.016981	0.0374181	0.0255468	0.0973923	0.0411672	425.364
Deielia phaon 12	0.363734	0.042637	0.0260001	0.0660463	-0.198051	0.0807511	-0.259105	0.0646307	-0.295089	0.0321517	-0.300416	0.00441865	-0.274608	-0.0297756	-0.246006	-0.0477486	-0.166646	-0.070443	-0.0929951	-0.0797487	-0.0765124	-0.0835028	0.0235224	-0.0856195	0.122908	-0.0683308	0.223123	-0.0446319	0.360678	0.0273751	0.195578	0.020524	0.224926	0.0187292	0.216542	-0.0299347	0.030835	0.042628	0.0260365	0.035652	-0.013126	0.0224046	-0.0179245	0.0154285	0.0337524	0.0243559	0.0928445	0.042003	363.527
Deielia phaon 13	0.357664	0.0452226	0.0263623	0.0668124	-0.196198	0.0834866	-0.257408	0.0705617	-0.300365	0.0290552	-0.303897	0.00521515	-0.275008	-0.028465	-0.243708	-0.0456457	-0.160527	-0.0768666	-0.0873521	-0.0836246	-0.0708527	-0.086036	0.0143831	-0.0896093	0.114796	-0.0751833	0.218497	-0.0441242	0.365993	0.025881	0.197496	0.0230227	0.225886	0.0219776	0.217501	-0.0317293	0.0281522	0.0433363	0.0206339	0.0368119	-0.00693124	0.0236438	-0.00963261	0.0178544	0.0335192	0.0257833	0.0909953	0.0426194	460.328
Deielia phaon 14	0.354486	0.0478739	0.0281129	0.063375	-0.196072	0.0796866	-0.257479	0.0638269	-0.298833	0.0240651	-0.303496	-0.00400531	-0.278669	-0.0339331	-0.248229	-0.0451251	-0.177556	-0.0639546	-0.0932662	-0.0759209	-0.0786217	-0.0763689	0.00846339	-0.0777152	0.125521	-0.0592426	0.224032	-0.0456543	0.35767	0.0254596	0.200458	0.0166481	0.226684	0.0136059	0.219013	-0.0336589	0.0295538	0.0421011	0.0226672	0.0366461	0.00282369	0.0259712	-0.00305708	0.0157091	0.0402287	0.0222577	0.0955661	0.0383525	407.153
Deielia phaon 15	0.362485	0.0489913	0.0287526	0.0618148	-0.197053	0.0736068	-0.257045	0.0581146	-0.293269	0.0260688	-0.300925	0.00325468	-0.273747	-0.0260851	-0.251698	-0.0360224	-0.164558	-0.0650896	-0.0916135	-0.0806403	-0.0817983	-0.0800829	0.0223919	-0.0862499	0.121249	-0.0694454	0.223463	-0.040813	0.363777	0.0262378	0.199595	0.0169127	0.225472	0.0183824	0.220776	-0.0329091	0.0289499	0.0425798	0.0216188	0.0376875	-0.0144584	0.0266867	-0.016157	0.0171909	0.0288278	0.0210887	0.0949643	0.0387203	438.449
Orthetrum testaceus 01	0.357078	0.0557748	0.0283125	0.0566749	-0.188146	0.0709034	-0.263958	0.0557748	-0.293618	0.0348185	-0.305359	0.00548878	-0.278832	-0.0239384	-0.248111	-0.0357086	-0.169281	-0.0596095	-0.0947408	-0.072288	-0.0840032	-0.0745981	0.0118444	-0.0831953	0.107016	-0.0740346	0.20941	-0.0521506	0.361811	0.032366	0.210924	0.0208811	0.231037	0.0176808	0.230028	-0.031007	0.0316982	0.0353816	0.0246419	0.030657	-0.00092552	0.022489	-0.00598173	0.0135479	0.0344966	0.0193193	0.094659	0.0347724	574.51
Orthetrum testaceus 02	0.353432	0.065382	0.0250725	0.0525817	-0.188445	0.0708718	-0.264143	0.0568058	-0.290655	0.0358806	-0.300855	0.00785662	-0.281975	-0.0188643	-0.253563	-0.0317617	-0.175157	-0.058306	-0.0881388	-0.0702273	-0.0795697	-0.0720865	0.00898928	-0.0832355	0.118995	-0.0779998	0.220979	-0.0549852	0.364605	0.0386535	0.205761	0.0172436	0.227963	0.0180657	0.226266	-0.0346143	0.0327096	0.0336463	0.0230535	0.0253957	0.00349335	0.0200406	-0.00085743	0.0128921	0.0262045	0.0164461	0.0858358	0.0303186	591.244
Orthetrum testaceus 03	0.36459	0.0566499	0.0254463	0.0613289	-0.191736	0.0718317	-0.266089	0.0540824	-0.296151	0.0264013	-0.303858	0.00335536	-0.278065	-0.0252245	-0.241623	-0.0353053	-0.154153	-0.0620291	-0.0922429	-0.0715451	-0.0830176	-0.0743079	-0.00251717	-0.0829487	0.0937881	-0.0789666	0.208609	-0.0555364	0.372644	0.0295778	0.201702	0.0168181	0.226506	0.0162768	0.226547	-0.0331941	0.0333343	0.0413047	0.0287176	0.0351617	0.00133942	0.0277543	-0.0067181	0.0180041	0.0363037	0.0233091	0.0966433	0.0372016	537.219
Orthetrum testaceus 04	0.347536	0.0611876	0.030356	0.058261	-0.185967	0.0740824	-0.26056	0.0606696	-0.299892	0.0283656	-0.306677	0.00326965	-0.282267	-0.0231464	-0.255388	-0.0318569	-0.176071	-0.0573616	-0.0859695	-0.0720736	-0.0721587	-0.0759308	0.0108773	-0.0862109	0.0977482	-0.0815909	0.220697	-0.0560676	0.358016	0.0338312	0.203345	0.0193164	0.226706	0.0173993	0.23353	-0.0335718	0.0346764	0.0389514	0.0297111	0.0313297	0.00601816	0.0228869	-0.000245391	0.0148026	0.034964	0.0196679	0.0910161	0.0337892	616.262
Orthetrum testaceus 05	0.357624	0.0589069	0.0291935	0.0524511	-0.186184	0.0674762	-0.257273	0.0526988	-0.286716	0.0297489	-0.29862	0.00672105	-0.282902	-0.0187142	-0.254094	-0.0334139	-0.181575	-0.0572847	-0.103678	-0.0689823	-0.0939026	-0.0714184	0.00544976	-0.0845787	0.11034	-0.0741791	0.215335	-0.0482908	0.364392	0.0355082	0.205698	0.0218398	0.230642	0.0202178	0.227651	-0.0254627	0.0342563	0.0339532	0.0278115	0.0248431	0.00491886	0.0185944	-0.00106023	0.0130802	0.0336455	0.0179451	0.0990481	0.0283403	601.717
Orthetrum testaceus 06	0.343986	0.0443327	0.03549	0.0602625	-0.190502	0.0703307	-0.273345	0.0519267	-0.309638	0.0224679	-0.311304	-0.0082402	-0.282867	-0.0245694	-0.242309	-0.0403547	-0.168199	-0.0570491	-0.0921368	-0.0615831	-0.0692483	-0.0651542	0.00858642	-0.0689473	0.120525	-0.0632946	0.219272	-0.0582023	0.350161	0.0141025	0.210225	0.0194342	0.230276	0.014749	0.229632	-0.0359225	0.0347063	0.0416983	0.0258718	0.0362104	-0.000429416	0.0297392	-0.00672862	0.021793	0.037517	0.0214058	0.100458	0.0348645	508.339
Orthetrum testaceus 07	0.354612	0.0578857	0.0304452	0.0559572	-0.193538	0.0714974	-0.264616	0.0549733	-0.296462	0.0272207	-0.302592	0.00312656	-0.28057	-0.0187225	-0.248682	-0.0319362	-0.161071	-0.0586848	-0.0955768	-0.0694541	-0.0841843	-0.0718993	-0.0047489	-0.0850444	0.110234	-0.0771216	0.216496	-0.0523961	0.363013	0.032248	0.204593	0.0194707	0.229025	0.0177883	0.23016	-0.0295765	0.0346673	0.0376545	0.030965	0.0293399	0.00264836	0.0237741	-0.00394976	0.013136	0.0336179	0.0180861	0.0955141	0.0326769	541.134
Pantala flavescens 01	0.358109	0.055147	0.0294694	0.0665533	-0.192367	0.0793403	-0.253762	0.055147	-0.283403	0.0219624	-0.287445	-0.00826478	-0.263386	-0.0361588	-0.237881	-0.0489019	-0.18215	-0.0656866	-0.131021	-0.0715471	-0.120196	-0.072019	-0.000338762	-0.0830351	0.124062	-0.0703241	0.219284	-0.0480962	0.373418	0.0241253	0.199687	0.0236256	0.227414	0.0202084	0.215328	-0.0307467	0.0363012	0.0437045	0.0277281	0.0361768	-0.00239446	0.0240428	-0.00636735	0.0162164	0.0385566	0.0250796	0.111354	0.043451	372.5
Pantala flavescens 02	0.33212	0.0518932	0.0314314	0.0660078	-0.188847	0.0866439	-0.258617	0.0713606	-0.29957	0.02968	-0.305842	-0.00335942	-0.283227	-0.0299815	-0.255256	-0.0445771	-0.168103	-0.0736445	-0.0995251	-0.085678	-0.0817048	-0.0888087	0.0135364	-0.0886312	0.131911	-0.0691535	0.225866	-0.0473715	0.343658	0.0183242	0.205972	0.0245813	0.227597	0.0206653	0.223989	-0.0279704	0.0347168	0.0448115	0.0258428	0.037273	0.00117874	0.02547	-0.00118737	0.0166568	0.0443062	0.02334	0.0997547	0.0424682	399.316
Pantala flavescens 03	0.358017	0.0518693	0.0306497	0.0633775	-0.195735	0.0765028	-0.260426	0.0621314	-0.296407	0.0308062	-0.306176	0.00343339	-0.277012	-0.0334142	-0.251748	-0.0468285	-0.181097	-0.0694449	-0.0848337	-0.0724236	-0.0735025	-0.0758885	0.0131642	-0.0797254	0.10883	-0.067019	0.227039	-0.0431447	0.362419	0.0257419	0.196137	0.0180032	0.221837	0.0172145	0.212604	-0.0305011	0.0328369	0.0391608	0.0264887	0.0333324	0.00251378	0.0223627	-0.00271635	0.0130257	0.0387617	0.0198216	0.0983554	0.0416065	427.24
Pantala flavescens 04	0.346882	0.0598882	0.0247088	0.0612335	-0.191365	0.078146	-0.255977	0.0642516	-0.289891	0.0430763	-0.303339	0.0107446	-0.281024	-0.0239542	-0.254809	-0.0420123	-0.171225	-0.074379	-0.0947845	-0.0841786	-0.0781439	-0.0880786	0.0292598	-0.0876954	0.136663	-0.0684048	0.225108	-0.0461388	0.3617	0.0307741	0.194446	0.0203591	0.224916	0.0170168	0.22065	-0.0300429	0.0276096	0.0373872	0.0183017	0.0311942	-0.00228968	0.0214296	-0.00931798	0.0136663	0.0308015	0.0200629	0.0911198	0.0356541	414.909
Pantala flavescens 05	0.357915	0.0570356	0.0326044	0.0677893	-0.200678	0.0831895	-0.256507	0.0664981	-0.299678	0.0253712	-0.298853	-0.0001695	-0.276333	-0.0299277	-0.242278	-0.0445603	-0.174745	-0.0686455	-0.0882697	-0.0812288	-0.0722878	-0.0842354	0.0168307	-0.0877571	0.108463	-0.0769039	0.21931	-0.0505751	0.370785	0.0204996	0.19165	0.0224092	0.220046	0.0201947	0.212228	-0.0317708	0.0347271	0.0460426	0.0272174	0.0369857	-0.00369195	0.0248252	-0.0098618	0.0161689	0.0339491	0.0258615	0.0974577	0.0429029	389.005
Pantala flavescens 06	0.34928	0.0531655	0.0269936	0.0672761	-0.191686	0.0817707	-0.256364	0.0649528	-0.300339	0.0257198	-0.303402	0.00161475	-0.277281	-0.0246414	-0.24974	-0.0437224	-0.174147	-0.0718817	-0.094082	-0.0828183	-0.0788755	-0.0834827	0.0130615	-0.0882465	0.130568	-0.0714394	0.226334	-0.0460718	0.353775	0.0209617	0.197295	0.0225145	0.222019	0.0171982	0.223552	-0.0289055	0.0322091	0.0430247	0.0244369	0.0360409	-0.00238259	0.0243035	-0.00552519	0.0181083	0.0387649	0.0244729	0.0955354	0.0400854	445.739
Pantala flavescens 07	0.356791	0.0657543	0.0216498	0.0591371	-0.192585	0.0848026	-0.25621	0.0704177	-0.295178	0.0319512	-0.297352	0.00648863	-0.277305	-0.0207032	-0.247279	-0.0393568	-0.162722	-0.0729821	-0.0966527	-0.082492	-0.0805761	-0.0888823	0.0070535	-0.0921043	0.108934	-0.0781269	0.224429	-0.0435601	0.366321	0.0437493	0.197887	0.0149082	0.225485	0.0170645	0.217582	-0.0324919	0.0245478	0.0369415	0.0225688	0.032149	0.000415468	0.0215389	-0.00246191	0.0118056	0.0357512	0.0191103	0.0989058	0.0348808	347.438
Pantala flavescens 08	0.350966	0.0318349	0.0235304	0.0655076	-0.199144	0.0758149	-0.262922	0.061377	-0.303516	0.0225705	-0.307954	0.00134462	-0.280427	-0.0255134	-0.248658	-0.037726	-0.162348	-0.0709367	-0.0941331	-0.0801584	-0.0849462	-0.0810404	0.0652988	-0.0765948	0.135351	-0.0598687	0.225959	-0.0380806	0.35696	0.0118982	0.189224	0.0184035	0.217097	0.017309	0.216722	-0.0286312	0.0273476	0.0427802	0.0231839	0.039744	-0.00638648	0.0260032	-0.0113652	0.0173187	0.0330961	0.0248304	0.0970645	0.0418134	397.6
Pantala flavescens 09	0.3577	0.0518509	0.0227585	0.0612915	-0.19465	0.0717589	-0.255076	0.0580521	-0.294395	0.0193077	-0.299274	0.00182863	-0.274908	-0.0212736	-0.246381	-0.0400744	-0.176425	-0.0619434	-0.0981575	-0.0747395	-0.0821751	-0.074472	0.00863485	-0.0781244	0.116625	-0.0687938	0.22951	-0.0429242	0.368905	0.0285284	0.19932	0.0191073	0.226639	0.0162731	0.225083	-0.0312432	0.0250007	0.0396998	0.0175897	0.032993	-0.0024423	0.0218431	-0.00560691	0.0142669	0.033338	0.0191505	0.0983866	0.0376367	423.298
Trithemis aurora 01	0.367426	0.0545848	0.0172187	0.0595353	-0.205486	0.0691061	-0.256944	0.0545848	-0.283744	0.0293805	-0.289587	0.00378387	-0.270088	-0.0171567	-0.245062	-0.0276755	-0.153211	-0.0561825	-0.0896742	-0.0667914	-0.0791719	-0.0705146	-0.0413523	-0.0779875	0.0882874	-0.0781639	0.22537	-0.0533575	0.378482	0.026788	0.211737	0.0139729	0.240323	0.0143254	0.236137	-0.0308736	0.0242931	0.0357133	0.0166287	0.0300881	-0.00210488	0.019532	-0.00451991	0.0140343	0.0282849	0.019804	0.0867566	0.03347	475.748
Trithemis aurora 02	0.362307	0.0481814	0.0198313	0.053909	-0.207842	0.0647023	-0.259637	0.0515932	-0.284247	0.03058	-0.292519	0.00752496	-0.273958	-0.0123731	-0.252198	-0.0229259	-0.1746	-0.0504217	-0.0804	-0.0683439	-0.0702772	-0.0701734	-0.0262352	-0.0792071	0.0998258	-0.0745041	0.234641	-0.0443046	0.368351	0.0248363	0.212891	0.0151155	0.236444	0.0162147	0.230826	-0.0276562	0.0276272	0.0325854	0.0210031	0.0272984	0.00130697	0.0191812	-0.00748883	0.0106028	0.0254245	0.0154341	0.0889239	0.0321509	518.415
Trithemis aurora 03	0.368254	0.044781	0.0114927	0.061404	-0.205584	0.0686181	-0.254764	0.0531274	-0.279698	0.028124	-0.286616	0.00311988	-0.270476	-0.018102	-0.24857	-0.0304969	-0.170316	-0.0555763	-0.0865841	-0.0702434	-0.0780092	-0.0723694	-0.0194619	-0.081379	0.0917968	-0.0763031	0.240527	-0.0476294	0.37708	0.011994	0.209148	0.0191342	0.230045	0.0167915	0.234547	-0.0282454	0.022733	0.0401103	0.01704	0.030887	-0.00299253	0.0239701	-0.00767656	0.0182056	0.0252905	0.0237889	0.0827938	0.0362889	477.315
Trithemis aurora 04	0.37208	0.0475256	0.0102676	0.0574707	-0.200224	0.0679559	-0.2561	0.0535035	-0.281915	0.0283455	-0.285054	0.000104747	-0.266378	-0.0182473	-0.244816	-0.0276351	-0.160652	-0.053857	-0.087768	-0.0650787	-0.0753173	-0.0682102	-0.0442704	-0.0764893	0.0954145	-0.0755629	0.231877	-0.0508439	0.38075	0.0240698	0.217493	0.0148662	0.246879	0.0150551	0.231271	-0.0301151	0.0213758	0.0372992	0.0159467	0.0297137	-0.00268683	0.0220491	-0.0101931	0.0142737	0.0228948	0.0206818	0.069126	0.0331248	470.028
Trithemis aurora 05	0.369243	0.0456901	0.0176441	0.0525411	-0.194367	0.0663828	-0.248793	0.0536666	-0.275788	0.0330281	-0.283292	0.00811681	-0.273557	-0.0120172	-0.249546	-0.0241627	-0.187998	-0.0512177	-0.0930817	-0.0746202	-0.0814873	-0.0780995	-0.0446262	-0.0861633	0.120721	-0.063638	0.233398	-0.0416894	0.37692	0.0256388	0.207404	0.0216757	0.236344	0.0197185	0.229501	-0.022266	0.0241241	0.0323001	0.0196135	0.0246322	-0.00123574	0.0168288	-0.00746881	0.00970587	0.0243229	0.0155626	0.0820045	0.0283858	458.427
Trithemis aurora 06	0.369303	0.0486895	0.00743496	0.0618657	-0.208298	0.0701036	-0.257615	0.0568735	-0.283535	0.0331424	-0.29093	0.00733471	-0.268269	-0.0180904	-0.243659	-0.0294778	-0.163976	-0.0566051	-0.0760685	-0.072274	-0.0659435	-0.0756599	-0.0261538	-0.078807	0.0880812	-0.07548	0.239208	-0.0492765	0.380107	0.0229054	0.205424	0.0124731	0.231983	0.0151235	0.230472	-0.0351667	0.0160583	0.0383893	0.0132314	0.0315781	-0.000918366	0.0241603	-0.00879192	0.0141631	0.0243144	0.0183305	0.088539	0.0357046	443.581
Trithemis aurora 07	0.375447	0.0514822	0.0193806	0.0591919	-0.203064	0.0642925	-0.257472	0.0485617	-0.277978	0.0308197	-0.285353	0.00247352	-0.267866	-0.0168304	-0.245331	-0.028368	-0.17125	-0.0540738	-0.0900223	-0.0661279	-0.0801083	-0.0694639	-0.047673	-0.0763896	0.0773098	-0.0816689	0.235792	-0.0476182	0.380291	0.0286582	0.206154	0.0151372	0.233056	0.0145693	0.229711	-0.0288229	0.027658	0.0379335	0.0213491	0.0282256	0.00120702	0.0206035	-0.00369462	0.0141234	0.0309965	0.02023	0.0914601	0.0330613	460.2
Trithemis aurora 08	0.364548	0.0462959	0.0227236	0.0628692	-0.213014	0.0698757	-0.261248	0.0525409	-0.284384	0.0282105	-0.291251	0.00277512	-0.270807	-0.020305	-0.244107	-0.0324839	-0.161926	-0.059333	-0.0882772	-0.0689697	-0.0809481	-0.0719568	-0.0406921	-0.0781648	0.0792656	-0.0785483	0.229598	-0.0452558	0.369082	0.0213668	0.209633	0.015884	0.237354	0.0141453	0.230804	-0.0312662	0.0296949	0.0396476	0.0230799	0.0317004	0.00514301	0.02405	0.00122361	0.0171364	0.0369577	0.0227216	0.0975476	0.0370641	532.804
Trithemis aurora 09	0.377796	0.0365842	0.00979801	0.0603164	-0.193455	0.0699038	-0.252031	0.0569932	-0.280192	0.0322891	-0.287824	0.00808548	-0.268946	-0.0158525	-0.246461	-0.0300999	-0.172091	-0.0590571	-0.0872812	-0.0764411	-0.0736643	-0.0798174	-0.0269998	-0.086641	0.107232	-0.0660217	0.226917	-0.0461375	0.383337	0.0192377	0.20636	0.0231087	0.236192	0.0199411	0.225352	-0.0214194	0.0197423	0.0377275	0.0120862	0.02858	-0.00676113	0.0200252	-0.0129163	0.0138913	0.0209089	0.0204758	0.0829021	0.0343278	472.853
Trithemis aurora 10	0.369412	0.0409056	0.00765925	0.0587249	-0.2033	0.0679516	-0.252666	0.056678	-0.28293	0.0316053	-0.290445	0.00464557	-0.270814	-0.0188862	-0.245158	-0.0311576	-0.168002	-0.0570288	-0.0818338	-0.0691345	-0.0718894	-0.0724985	-0.0410154	-0.0801912	0.111488	-0.0699489	0.236367	-0.0471518	0.370788	0.0156005	0.210126	0.0189712	0.234411	0.0175581	0.238013	-0.0271489	0.0185136	0.0386206	0.0135712	0.0289809	-0.00473472	0.0209576	-0.00913131	0.0156426	0.025716	0.021051	0.0858556	0.035253	493.153
Trithemis aurora 11	0.375449	0.055897	0.0128145	0.056662	-0.195975	0.0694128	-0.24653	0.0588672	-0.279169	0.034513	-0.288151	0.010302	-0.271393	-0.0141667	-0.245438	-0.0280318	-0.161386	-0.0579973	-0.0892046	-0.0721865	-0.0823404	-0.0744765	-0.0388798	-0.0833622	0.0760078	-0.0816941	0.238732	-0.04913	0.380727	0.0368429	0.2078	0.0155596	0.235178	0.017223	0.231608	-0.028826	0.0220092	0.033947	0.0157741	0.026724	-0.00338281	0.0178136	-0.00769675	0.00895377	0.0239668	0.0154573	0.0894811	0.0316958	469.486
Trithemis aurora 12	0.380279	0.0462283	0.0155266	0.0647488	-0.209054	0.0731732	-0.259803	0.0584931	-0.286715	0.0314718	-0.29115	0.0103981	-0.265988	-0.0156021	-0.223077	-0.0373941	-0.141154	-0.0648567	-0.0870732	-0.0744146	-0.0794617	-0.0767652	-0.0542072	-0.0854656	0.0773368	-0.0811799	0.231198	-0.0545377	0.379043	0.0282903	0.206424	0.0183245	0.234205	0.0185334	0.228351	-0.0306295	0.0221125	0.0411279	0.0171452	0.0317558	0.000981467	0.023633	-0.00503112	0.0153272	0.0236267	0.0220252	0.0864847	0.0373149	464.354
Trithemis aurora 13	0.370698	0.0493668	0.015147	0.0671441	-0.202447	0.0755462	-0.255092	0.0624039	-0.287834	0.0329362	-0.294427	0.00964858	-0.263518	-0.0211119	-0.213064	-0.0436969	-0.152376	-0.0638968	-0.0982957	-0.0736735	-0.0874164	-0.0770051	-0.0417813	-0.0864033	0.0688199	-0.0840091	0.234718	-0.0511122	0.374826	0.0261882	0.216251	0.0173785	0.23997	0.0180839	0.23431	-0.0338921	0.0220917	0.0410301	0.0151091	0.0345803	-0.00396607	0.0245109	-0.00660325	0.0151959	0.0268092	0.0217093	0.0880716	0.039078	483.584
Acisoma panorpoides 01	0.355922	0.0588337	0.0332754	0.0593236	-0.196551	0.0709692	-0.270088	0.0588337	-0.310502	0.0237989	-0.315271	0.0012312	-0.291465	-0.030483	-0.237601	-0.0339281	-0.149715	-0.0587569	-0.0838928	-0.0717437	-0.0746298	-0.0747739	0.0238636	-0.0837706	0.107786	-0.0700058	0.217306	-0.0406876	0.365132	0.0328997	0.194562	0.0170181	0.216568	0.0154492	0.211774	-0.0240999	0.0394537	0.0351856	0.042402	0.0266813	-0.00174909	0.0223247	-0.00955082	0.012612	0.0393158	0.0166323	0.0936537	0.036456	358.974
Acisoma panorpoides 02	0.358269	0.0612416	0.0376449	0.0682874	-0.19371	0.0828715	-0.265778	0.0613101	-0.299427	0.0277113	-0.306247	0.00810238	-0.293068	-0.0323365	-0.244647	-0.0511864	-0.16821	-0.0740602	-0.0861577	-0.0833284	-0.0709504	-0.0881433	0.0235149	-0.0914165	0.117996	-0.0738749	0.210881	-0.0491269	0.357045	0.0296199	0.189318	0.0205393	0.207329	0.0177237	0.205693	-0.0287083	0.0416303	0.0450677	0.0324168	0.035868	0.00358777	0.0246817	-0.00442398	0.0166819	0.04642	0.0266509	0.100873	0.0458238	339.649
Acisoma panorpoides 03	0.359425	0.0469505	0.0400982	0.075869	-0.186905	0.0792456	-0.260682	0.0562858	-0.294557	0.0248386	-0.306825	-0.00145788	-0.282977	-0.0462781	-0.242107	-0.0531914	-0.171503	-0.0710159	-0.0929963	-0.0791659	-0.078699	-0.0816679	0.0247204	-0.0895206	0.111767	-0.0760237	0.210299	-0.0498491	0.367823	0.0151031	0.190777	0.0252845	0.216454	0.0201223	0.208803	-0.0244159	0.0376953	0.0532674	0.0330858	0.0433033	-0.00900194	0.0316585	-0.0150997	0.0189219	0.0413444	0.0334516	0.0990594	0.0482844	348.603
Acisoma panorpoides 04	0.350133	0.053375	0.0368121	0.0637485	-0.190797	0.0868639	-0.267517	0.0639656	-0.303697	0.0307083	-0.31785	0.000625001	-0.295141	-0.0441404	-0.247054	-0.0566404	-0.155126	-0.0739711	-0.0848747	-0.0761107	-0.0689355	-0.0780125	0.0268978	-0.0790429	0.126621	-0.0645714	0.21687	-0.0443276	0.359888	0.0204391	0.182066	0.015446	0.204393	0.0134223	0.211163	-0.0294414	0.0436479	0.0452462	0.0398947	0.0369307	-0.000166591	0.0305064	-0.00836479	0.01948	0.045286	0.0264437	0.0958495	0.0390578	334.114
Acisoma panorpoides 05	0.340614	0.0689962	0.0301504	0.0701961	-0.189661	0.0868742	-0.259198	0.0717624	-0.300427	0.0407857	-0.315178	0.0140128	-0.29681	-0.0332901	-0.244736	-0.0535253	-0.166733	-0.0780591	-0.0742483	-0.0878067	-0.0626776	-0.0905844	0.0385827	-0.0940526	0.126654	-0.0759982	0.214859	-0.0519505	0.357927	0.0334697	0.187899	0.0186908	0.211385	0.0178048	0.209336	-0.0308395	0.0369348	0.0411418	0.0319925	0.0346565	-0.00144961	0.0247324	-0.0120992	0.00974032	0.0410627	0.0219809	0.0958215	0.0412614	320.789
Acisoma panorpoides 06	0.35891	0.0645829	0.0429582	0.0662128	-0.184134	0.08267	-0.260973	0.0638607	-0.300335	0.0286712	-0.311172	0.00491579	-0.28762	-0.0394382	-0.244571	-0.0523114	-0.159429	-0.0748294	-0.0900928	-0.0812678	-0.0777513	-0.0831927	0.0063039	-0.08982	0.103713	-0.0742189	0.206986	-0.042839	0.368782	0.0343561	0.191676	0.01903	0.212992	0.0174882	0.204406	-0.0302811	0.0426575	0.0445417	0.0370093	0.0332672	-0.00165429	0.0295731	-0.00957582	0.0141151	0.0468264	0.0234702	0.104087	0.0414435	346.113
Acisoma panorpoides 07	0.35515	0.06431	0.0311863	0.0684408	-0.182104	0.0794134	-0.262223	0.0609186	-0.292453	0.04208	-0.309592	0.00984898	-0.29799	-0.0339896	-0.243586	-0.0569461	-0.168551	-0.0747949	-0.0831702	-0.0852823	-0.0710708	-0.0875816	0.027947	-0.0897013	0.131092	-0.0719652	0.214929	-0.0499345	0.361113	0.0271449	0.186256	0.0222752	0.21012	0.0187737	0.209563	-0.0323809	0.0387326	0.043756	0.0294385	0.0349166	-0.00512019	0.0243518	-0.0150083	0.0135313	0.042834	0.0264155	0.0925077	0.0463996	335.258
Acisoma panorpoides 08	0.354845	0.0645875	0.0353273	0.0646163	-0.188533	0.0788898	-0.266053	0.0628856	-0.302023	0.0318889	-0.317354	0.000746119	-0.290746	-0.041597	-0.242482	-0.0494251	-0.166303	-0.0675816	-0.0848464	-0.0752496	-0.0726473	-0.0765894	0.0206375	-0.0773354	0.117376	-0.0680608	0.210774	-0.0503144	0.363235	0.0296195	0.191962	0.0161846	0.2126	0.0160386	0.208242	-0.0321124	0.0438786	0.0403791	0.0363103	0.0312461	0.00101954	0.0233568	-0.00440267	0.0141915	0.0444427	0.0230323	0.0947407	0.0406029	329.377
Acisoma panorpoides 09	0.352642	0.0648927	0.0411839	0.068929	-0.187025	0.0862582	-0.263181	0.0702351	-0.30531	0.0376361	-0.321609	0.00112493	-0.28788	-0.0376093	-0.234977	-0.056609	-0.159059	-0.0813427	-0.0842502	-0.0848291	-0.0689619	-0.0889094	0.0132702	-0.0935805	0.112385	-0.0760066	0.204103	-0.0552335	0.361922	0.0289672	0.185927	0.0221916	0.208362	0.01941	0.205366	-0.0304536	0.0449145	0.0467165	0.036556	0.0359803	0.00358296	0.0272801	-0.00444475	0.0180893	0.049941	0.028671	0.0965431	0.0481915	337.686
Tramea virginia 01	0.356228	0.0603646	0.0225274	0.0595915	-0.234808	0.0718205	-0.278318	0.0603646	-0.308498	0.0418182	-0.320666	0.0207646	-0.282235	-0.0172634	-0.214097	-0.037372	-0.144825	-0.059563	-0.0608954	-0.0724016	-0.0533241	-0.0744178	0.0146701	-0.0875398	0.120155	-0.0763204	0.221107	-0.054809	0.358038	0.0216611	0.194039	0.0139687	0.210443	0.0129168	0.214646	-0.0467505	0.0299798	0.0365378	0.0239999	0.0292488	0.00950809	0.0246844	0.00227026	0.0163774	0.028653	0.0200948	0.0914046	0.0362237	667.249
Tramea virginia 02	0.352418	0.0666514	0.0218252	0.0586005	-0.234379	0.0766741	-0.281222	0.0636647	-0.30942	0.0462869	-0.322813	0.0237908	-0.280423	-0.0158017	-0.212793	-0.0379703	-0.132828	-0.0642971	-0.0581629	-0.0758513	-0.0511761	-0.0773288	0.0127186	-0.0900833	0.110042	-0.08853	0.223594	-0.0600285	0.358633	0.0282378	0.188455	0.0147513	0.210611	0.0135677	0.216856	-0.0443956	0.0296203	0.0373377	0.0243409	0.0283157	0.00980385	0.0237949	0.00205382	0.0157331	0.0343127	0.021262	0.0879342	0.0356179	643.688
Tramea virginia 03	0.361498	0.0700039	0.0215333	0.052229	-0.231443	0.0757029	-0.272471	0.0650322	-0.298551	0.0476865	-0.316188	0.0260355	-0.276953	-0.0161378	-0.216642	-0.0373554	-0.145277	-0.0664454	-0.0628871	-0.0774976	-0.0539018	-0.0789964	0.00562318	-0.0890754	0.107633	-0.085764	0.223712	-0.0595407	0.367795	0.0324342	0.189927	0.0196397	0.212271	0.0170566	0.217464	-0.0428125	0.0272596	0.0338908	0.0225622	0.0271455	0.00346243	0.0221369	-0.00397519	0.0117794	0.0315496	0.0179018	0.0859985	0.0349503	662.066
Tramea virginia 04	0.355118	0.0536546	0.0205101	0.0637725	-0.242945	0.0749265	-0.284403	0.06227	-0.312439	0.0420963	-0.323271	0.0176453	-0.284013	-0.0195451	-0.207642	-0.0410519	-0.138979	-0.0636201	-0.0493457	-0.0739359	-0.0412291	-0.0758393	0.0218349	-0.0840735	0.117483	-0.0766434	0.216049	-0.0531025	0.360507	0.0145195	0.184577	0.0087236	0.206117	0.00806425	0.213506	-0.0455982	0.0278449	0.0412187	0.0245515	0.0344212	0.00874581	0.0307344	0.00386692	0.0200933	0.0317358	0.0239306	0.0918198	0.0373393	668.282
Tramea virginia 05	0.356792	0.0645534	0.0268408	0.0604272	-0.235148	0.0729702	-0.277791	0.0613396	-0.309166	0.0407895	-0.32017	0.0211683	-0.283516	-0.0141653	-0.215338	-0.0367226	-0.145593	-0.0602298	-0.0576242	-0.0729864	-0.0503926	-0.0775261	0.0124039	-0.089818	0.120693	-0.0857776	0.216454	-0.0631687	0.361314	0.0299302	0.185173	0.0150077	0.205768	0.0142338	0.209517	-0.0476223	0.0323845	0.0400807	0.0253775	0.0296405	0.0122244	0.0264795	0.00434165	0.0139045	0.0348307	0.0213501	0.0906264	0.0361417	671.794
Tramea virginia 06	0.355158	0.0501256	0.0248529	0.0601041	-0.243622	0.0685639	-0.284783	0.0571471	-0.311651	0.035986	-0.324162	0.011346	-0.275594	-0.0176862	-0.220644	-0.0339668	-0.140158	-0.055894	-0.05932	-0.0635744	-0.0518269	-0.0661568	0.0266659	-0.0719271	0.126069	-0.0732585	0.224067	-0.0589816	0.356383	0.0154369	0.189509	0.00869317	0.207676	0.0101884	0.214263	-0.0473708	0.0301649	0.0386553	0.0272981	0.0311522	0.0078196	0.0264791	-0.000429423	0.0182167	0.03161	0.0219097	0.0906544	0.0348118	716.71
Tramea virginia 07	0.352624	0.0639061	0.0209532	0.0579345	-0.241509	0.0744857	-0.283427	0.0655076	-0.309482	0.0480618	-0.326747	0.0251213	-0.28381	-0.0146316	-0.209641	-0.0368323	-0.134385	-0.0605285	-0.0523428	-0.0756384	-0.0441555	-0.0782584	0.0305029	-0.0865081	0.125118	-0.0832283	0.221834	-0.0633412	0.351506	0.0267624	0.186499	0.0143815	0.207184	0.0129586	0.21512	-0.0489113	0.0268355	0.0374162	0.0231751	0.0276732	0.0107378	0.024349	-0.000682946	0.0149085	0.0274794	0.0189186	0.0866146	0.035493	551.538
Orthetrum albistylum 01	0.354458	0.0590049	0.0203094	0.053921	-0.189806	0.0654305	-0.242633	0.0590049	-0.272091	0.046199	-0.304293	0.0146016	-0.289407	-0.0154781	-0.260512	-0.0296129	-0.192492	-0.0563224	-0.0833968	-0.0742242	-0.0762043	-0.0761141	0.018645	-0.0845247	0.115793	-0.0767997	0.213354	-0.0560362	0.368415	0.0299003	0.209121	0.0163581	0.228665	0.0132143	0.233813	-0.033391	0.0231648	0.0343261	0.0161393	0.0274494	-0.00257342	0.0217152	-0.00904635	0.0140631	0.0240096	0.018209	0.0965666	0.0291058	614.604
Orthetrum albistylum 02	0.36364	0.052413	0.0251447	0.0509106	-0.202589	0.0701845	-0.257552	0.0630369	-0.276037	0.0558698	-0.303074	0.015894	-0.284362	-0.0187686	-0.252804	-0.0351398	-0.187971	-0.059036	-0.083147	-0.0753954	-0.072448	-0.0768053	0.0119592	-0.0885973	0.111593	-0.0753626	0.22819	-0.0437931	0.358135	0.0261325	0.203306	0.0187162	0.222848	0.0136875	0.226988	-0.0268635	0.0272184	0.0325388	0.0211838	0.0248844	0.00290998	0.0202894	0.00217957	0.0150943	0.0306873	0.0172512	0.0840009	0.0228585	580.579
Orthetrum albistylum 03	0.358804	0.0466969	0.024241	0.0516323	-0.202512	0.0676702	-0.259104	0.0536325	-0.290827	0.0333824	-0.306068	0.00708447	-0.276913	-0.020542	-0.235488	-0.0295063	-0.171905	-0.0501878	-0.0884592	-0.0605583	-0.0828161	-0.0641429	0.0157798	-0.0834592	0.108751	-0.0729154	0.228204	-0.0429516	0.37113	0.0122255	0.209125	0.00776647	0.228486	0.00993691	0.233196	-0.0311145	0.0209067	0.0349824	0.016907	0.0319605	-0.00784909	0.02804	-0.0158314	0.0181178	0.0300961	0.0203158	0.0921464	0.0319339	663.801
Orthetrum albistylum 04	0.341588	0.044262	0.0234524	0.0579409	-0.200582	0.0761561	-0.256231	0.063818	-0.285364	0.0479058	-0.313593	0.00472725	-0.286793	-0.0264585	-0.250734	-0.0375427	-0.172708	-0.0569061	-0.0914943	-0.0694587	-0.0831275	-0.0719413	0.0322386	-0.081375	0.12817	-0.075169	0.226271	-0.0536245	0.352505	0.0203023	0.205716	0.0153088	0.22778	0.0118527	0.22906	-0.0379409	0.0296918	0.0391693	0.0202662	0.0298561	-0.000520375	0.0260664	-0.00408148	0.0205089	0.0285577	0.0219722	0.0999323	0.0305701	573.191
Orthetrum albistylum 05	0.352835	0.0427134	0.0246416	0.0587155	-0.202932	0.0728038	-0.255105	0.0581286	-0.289551	0.0369471	-0.306992	0.00728942	-0.28091	-0.0231435	-0.242832	-0.0342878	-0.164567	-0.0585427	-0.0927107	-0.0677801	-0.0869412	-0.0687056	0.0100364	-0.0858219	0.109885	-0.0780652	0.229738	-0.0466578	0.363092	0.0158531	0.207522	0.013796	0.229388	0.0124759	0.230101	-0.0330827	0.0268069	0.0394443	0.0203564	0.0324245	-0.00109052	0.0300148	-0.00608468	0.0184374	0.028623	0.0232814	0.0966903	0.0337622	560.898
Orthetrum albistylum 06	0.350888	0.0477441	0.0232986	0.0585513	-0.199989	0.0721315	-0.257266	0.0589063	-0.286211	0.0413212	-0.309121	0.00469455	-0.289482	-0.021474	-0.247523	-0.0332466	-0.165369	-0.0563747	-0.087102	-0.0683323	-0.0786107	-0.0698714	0.0163016	-0.0843614	0.110297	-0.0758924	0.233913	-0.0509296	0.36089	0.0198433	0.204383	0.0115023	0.226248	0.00857604	0.229587	-0.0380705	0.026789	0.0389923	0.017227	0.0332344	0.00473086	0.0280763	-0.00366508	0.0189672	0.0291134	0.0227846	0.090673	0.0332274	611.585
Orthetrum albistylum 07	0.359132	0.0453884	0.0289418	0.059238	-0.197965	0.0693672	-0.252104	0.0545049	-0.288063	0.0362561	-0.303804	0.00845493	-0.28491	-0.0198989	-0.248248	-0.0341141	-0.173155	-0.0576781	-0.0851181	-0.0731478	-0.0753411	-0.0750485	-0.0132316	-0.0894435	0.0742975	-0.0792584	0.229542	-0.0460078	0.370475	0.0173634	0.203311	0.0211623	0.227656	0.0198151	0.227198	-0.0323998	0.0325386	0.0383512	0.0280851	0.0320448	0.010537	0.0260904	0.00323533	0.0192935	0.0370532	0.0234878	0.0899364	0.0361789	648.763
Orthetrum albistylum 08	0.343545	0.0531701	0.0292802	0.0585848	-0.200423	0.0745864	-0.257198	0.0635461	-0.293158	0.0414683	-0.30968	0.00995559	-0.285056	-0.0251051	-0.247883	-0.0323817	-0.176801	-0.0564777	-0.0914859	-0.071466	-0.0795389	-0.0726672	0.0185596	-0.0884598	0.132888	-0.072775	0.223076	-0.052653	0.358277	0.0145453	0.201494	0.013165	0.223133	0.00989819	0.2254	-0.0305387	0.0318985	0.037072	0.0208714	0.0307146	0.00537749	0.0246986	-0.00233791	0.0202193	0.0321709	0.020289	0.0975892	0.030611	668.377
Orthetrum melania 01	0.339309	0.057834	0.0176486	0.0588982	-0.208457	0.0695108	-0.26942	0.057834	-0.305459	0.036144	-0.31154	0.00226578	-0.280527	-0.0275809	-0.248015	-0.0398633	-0.16019	-0.0703844	-0.0713388	-0.073093	-0.0617315	-0.0745841	0.022632	-0.0833793	0.145126	-0.0677197	0.230031	-0.046411	0.349762	0.0253353	0.197721	0.017586	0.218912	0.0142468	0.231049	-0.0342285	0.0243576	0.0404627	0.0166856	0.0327885	0.00536619	0.0263854	-0.000813439	0.0206454	0.0266094	0.0244652	0.0922814	0.0328422	815.363
Orthetrum melania 02	0.324331	0.0611123	0.0315302	0.0532011	-0.208499	0.0595326	-0.269722	0.0465961	-0.3041	0.023166	-0.314863	-0.00976517	-0.293034	-0.0239831	-0.260738	-0.0336221	-0.177057	-0.0473053	-0.0717447	-0.0598913	-0.0642167	-0.0600878	0.0263278	-0.0722663	0.147016	-0.0687474	0.232442	-0.042728	0.332322	0.0175663	0.211664	0.0134706	0.230254	0.0118111	0.228757	-0.0327945	0.0301298	0.0352025	0.0222445	0.0310436	0.0111866	0.0267237	0.00303162	0.0164789	0.0358228	0.019877	0.0969139	0.0354092	718.928
Orthetrum melania 03	0.340567	0.0566419	0.0198393	0.0577777	-0.207368	0.0581986	-0.266087	0.0462787	-0.30439	0.0199456	-0.301199	-0.0029298	-0.286308	-0.0188686	-0.248324	-0.0351517	-0.171976	-0.0499459	-0.0746513	-0.0643282	-0.0632344	-0.0671707	0.00823675	-0.0748718	0.130046	-0.0738345	0.239254	-0.0460674	0.350314	0.0329894	0.205622	0.0145609	0.229269	0.0148424	0.231707	-0.0388438	0.0196984	0.0361749	0.0168429	0.034519	0.00639612	0.0264767	-0.00252251	0.0176416	0.0276833	0.0218791	0.100584	0.0340858	720.646
Orthetrum melania 04	0.355427	0.0573495	0.0253988	0.0550166	-0.209413	0.0675584	-0.261596	0.0539992	-0.297291	0.0269077	-0.300641	-0.00343186	-0.279749	-0.0244994	-0.25151	-0.0374372	-0.168335	-0.0628239	-0.0846703	-0.0695091	-0.0761994	-0.0722412	0.00858305	-0.0782951	0.119537	-0.0677961	0.229077	-0.0407033	0.357966	0.0298939	0.203775	0.0220918	0.225103	0.0151256	0.225914	-0.0236234	0.0249084	0.0363151	0.0240666	0.0302385	0.00294863	0.0216992	-0.00227924	0.0171247	0.0315396	0.0188359	0.0974396	0.0282045	683.28
Orthetrum melania 05	0.342522	0.0536972	0.0193545	0.0567809	-0.206208	0.0632306	-0.266857	0.0514759	-0.304261	0.0265004	-0.309269	0.00177031	-0.289858	-0.0157846	-0.254344	-0.0360779	-0.166229	-0.0630216	-0.0725581	-0.0719731	-0.0604683	-0.0728156	0.0262365	-0.0792222	0.166541	-0.0622382	0.224057	-0.045312	0.345677	0.0243444	0.198186	0.0198272	0.220194	0.0157909	0.223744	-0.0348362	0.0263037	0.0371615	0.0173928	0.0325554	0.00331026	0.0248164	-0.00209568	0.0179457	0.027444	0.0234085	0.0911819	0.0319759	696.386
Orthetrum melania 06	0.343495	0.0536316	0.0185608	0.057363	-0.209563	0.0681427	-0.270804	0.055311	-0.300012	0.0334198	-0.31539	0.000626938	-0.279827	-0.0279699	-0.24236	-0.0401151	-0.157733	-0.066317	-0.0779104	-0.0695873	-0.0723889	-0.0704018	0.0223796	-0.0764546	0.135534	-0.0654186	0.231038	-0.0454078	0.351772	0.0235418	0.204627	0.0228446	0.223902	0.0195611	0.229573	-0.0330415	0.0256806	0.0354798	0.0189489	0.0326611	0.00568073	0.0234036	-0.00267479	0.0148938	0.0260789	0.0214819	0.0913921	0.0323506	740.388
Pseudothemis zonata 01	0.384737	0.05248	0.00423981	0.0629374	-0.189451	0.063439	-0.247047	0.05248	-0.284308	0.0346397	-0.303684	0.00898886	-0.275612	-0.0309047	-0.219616	-0.0579009	-0.159596	-0.0729001	-0.0914852	-0.0751023	-0.0806784	-0.0744669	0.0073583	-0.0800781	0.108607	-0.0620463	0.228293	-0.040238	0.384949	0.0317016	0.202459	0.0213634	0.227656	0.0220972	0.225503	-0.0274451	0.00885358	0.0401181	0.00397388	0.0299406	-0.0106187	0.0234174	-0.0170218	0.0153004	0.0204469	0.0232435	0.0720436	0.0389353	581.033
Pseudothemis zonata 02	0.391155	0.0538684	0.00347748	0.0660942	-0.197239	0.0664163	-0.253546	0.0540214	-0.291993	0.0276473	-0.300529	-0.000763347	-0.262079	-0.0312041	-0.210248	-0.0497997	-0.154244	-0.0640587	-0.0866344	-0.0713785	-0.0778344	-0.0747782	0.00445341	-0.0815222	0.106388	-0.0746774	0.221569	-0.0438593	0.389691	0.0339096	0.20434	0.0194913	0.228609	0.0177898	0.220564	-0.0285983	0.00762537	0.0421828	0.00177276	0.0342709	-0.0130198	0.0267786	-0.0218947	0.0173572	0.0133836	0.0241337	0.0762332	0.0366783	605.5
Pseudothemis zonata 03	0.395855	0.0541033	0.00332139	0.0625926	-0.196465	0.0610351	-0.248155	0.0517397	-0.288966	0.0254355	-0.300648	-0.000521914	-0.263969	-0.0321043	-0.215711	-0.0473443	-0.146911	-0.063358	-0.0920209	-0.0711805	-0.0799227	-0.0698637	-0.00133241	-0.0776427	0.0957205	-0.0718978	0.222478	-0.035985	0.40138	0.0297483	0.200959	0.0166242	0.222672	0.0178378	0.221817	-0.0241705	0.00519149	0.0405958	0.000227228	0.0319903	-0.010326	0.0259551	-0.0180926	0.0159117	0.0180769	0.0220974	0.0748213	0.0384018	600.874
Anotogaster sieboldii 01	0.3434	0.0517604	0.0302241	0.0532633	-0.173661	0.0610626	-0.224712	0.0517604	-0.260532	0.0345248	-0.27836	0.0153493	-0.279609	-0.00680373	-0.266304	-0.0167286	-0.215111	-0.0412222	-0.114861	-0.0641467	-0.0954485	-0.0683686	-0.0259991	-0.0814952	0.107576	-0.0798708	0.246871	-0.0490341	0.36329	0.0101517	0.214454	0.00710007	0.26308	0.00681767	0.248131	-0.0205409	0.0268719	0.0342341	0.020325	0.0299995	-0.0198412	0.0205078	-0.0267907	0.0141224	0.0212097	0.0140833	0.0957982	0.0234736	852.842
Anotogaster sieboldii 02	0.354659	0.0426248	0.025714	0.0494732	-0.1795	0.0568562	-0.230855	0.0477285	-0.260374	0.0349144	-0.276341	0.0164696	-0.279281	-0.00596367	-0.265316	-0.0183499	-0.197301	-0.042733	-0.108723	-0.0593818	-0.0919629	-0.0632942	-0.0302236	-0.0740937	0.111909	-0.0738877	0.246602	-0.0466242	0.365982	0.00817866	0.213362	0.00748322	0.264945	0.00541363	0.251183	-0.0206071	0.02098	0.0339816	0.0148237	0.0281938	-0.0256699	0.019257	-0.0325729	0.0140662	0.0152394	0.015317	0.0927215	0.0249776	845.336
Anotogaster sieboldii 03	0.349259	0.0460459	0.026629	0.0446883	-0.172139	0.0594709	-0.225282	0.0522121	-0.25996	0.0348428	-0.278146	0.0178341	-0.277248	-0.00186327	-0.263322	-0.0143816	-0.203775	-0.0411543	-0.117479	-0.0588268	-0.0960545	-0.0651737	-0.0309398	-0.0797259	0.127724	-0.0712823	0.250157	-0.0440399	0.366806	0.0090208	0.212486	0.00946038	0.262862	0.00648011	0.252004	-0.0138101	0.0243497	0.027996	0.013851	0.022483	-0.0343933	0.0167742	-0.0377856	0.0109129	0.0231773	0.0122723	0.087217	0.0197642	943.929
