# Supplementary material for: Phylogeny of Libellulidae (Odonata: Anisoptera): comparison of molecular and morphology-based phylogenies based on wing morphology and migration
Source: PeerJ. 2020 Feb 14;8:e8567. doi: 10.7717/peerj.8567 (PMC7025703; doi:10.7717/peerj.8567)
Supplement: Supplemental Information 2 — Landmark data were subjected to generalized procrustes superimposition to standardize. All standardized data were converted into a two-dimensional data format. [file peerj-08-8567-s002.xlsx]

## Sheet: Sheet1
Species	x1	y1	x2	y2	x3	y3	x4	y4	x5	y5	x6	y6	x7	y7	x8	y8	x9	y9	x10	y10	x11	y11	x12	y12	x13	y13	x14	y14	x15	y15	x16	y16	x17	y17	x18	y18	x19	y19	x20	y20	x21	y21	x22	y22	x23	y23	x24	y24	x25
Crocothemis servilia 01	0.306614	0.061624	0.0423302	0.0611367	-0.181232	0.0790771	-0.250921	0.061624	-0.277434	0.0407293	-0.292982	0.0139954	-0.278078	-0.011213	-0.2403	-0.0279117	-0.229712	-0.0311588	-0.150439	-0.054698	-0.0706571	-0.0730145	-0.0612288	-0.0772641	0.0457974	-0.105906	0.159342	-0.119026	0.278018	-0.0956124	0.313152	0.0253738	0.177383	0.0257632	0.22595	0.0211474	0.21154	0.00828434	0.0459193	0.0459225	0.0407059	0.0363904	0.0198895	0.0286875	0.0143646	0.022047	0.0482956	0.0265799	0.103681
Crocothemis servilia 02	0.303698	0.0497893	0.0460109	0.0541538	-0.178487	0.0750415	-0.257292	0.0621819	-0.28945	0.0381048	-0.298767	0.0152277	-0.27772	-0.00510155	-0.240176	-0.0178161	-0.227059	-0.0216786	-0.148871	-0.0461774	-0.0701099	-0.0699845	-0.0611606	-0.0736029	0.0580057	-0.106666	0.167732	-0.110653	0.293277	-0.0525743	0.312571	0.0267167	0.172875	0.0138469	0.221579	0.0146194	0.211993	-0.00541385	0.0469898	0.0370308	0.0397939	0.032207	0.0175201	0.0250033	0.0100801	0.016012	0.0487798	0.0180715	0.0981866
Crocothemis servilia 03	0.291514	0.0591113	0.0535017	0.0554401	-0.179354	0.0736541	-0.257073	0.0592286	-0.293272	0.0300118	-0.2974	0.00781591	-0.274539	-0.00784246	-0.246458	-0.0158803	-0.234473	-0.019278	-0.151191	-0.0454568	-0.0697589	-0.0662531	-0.0611969	-0.0687285	0.0501569	-0.102606	0.16082	-0.112046	0.287167	-0.0755249	0.299261	0.0253623	0.179613	0.0162054	0.226772	0.0182179	0.219813	1.81e-05	0.0539623	0.0391484	0.0456306	0.033478	0.019339	0.0262809	0.0111416	0.0158587	0.0534526	0.021131	0.112571
Crocothemis servilia 04	0.302478	0.0559483	0.0434052	0.0589486	-0.181551	0.0736066	-0.253395	0.0582348	-0.277761	0.0374867	-0.286797	0.0130164	-0.270766	-0.00749285	-0.239505	-0.0193991	-0.227293	-0.0251143	-0.159915	-0.0455983	-0.0744473	-0.0688315	-0.0645841	-0.0721047	0.0535327	-0.106244	0.154632	-0.117801	0.3092	-0.0732351	0.310479	0.0273802	0.177122	0.0173162	0.227812	0.0187235	0.217844	-0.000936263	0.04544	0.0404239	0.0395027	0.0343781	0.00992142	0.027082	0.00254198	0.0172989	0.0433619	0.0216372	0.0987405
Crocothemis servilia 05	0.288289	0.0584691	0.0482281	0.0571782	-0.178819	0.0770458	-0.251565	0.0649525	-0.278894	0.0446195	-0.291003	0.0196287	-0.272902	-0.00798906	-0.245055	-0.0207724	-0.235866	-0.0240772	-0.156643	-0.0518644	-0.0786291	-0.0748601	-0.0681838	-0.079455	0.0453455	-0.113107	0.164907	-0.123916	0.30374	-0.0493405	0.297092	0.0258803	0.181124	0.0194507	0.226934	0.0169364	0.215601	0.00244126	0.0505436	0.0396378	0.04246	0.0301936	0.0181765	0.02351	0.0129954	0.0168927	0.0547396	0.0198441	0.107386
Crocothemis servilia 06	0.300692	0.0471723	0.0404276	0.0523513	-0.186066	0.073319	-0.264178	0.060303	-0.290906	0.0324519	-0.294096	0.0161818	-0.269471	-0.00341859	-0.238411	-0.015124	-0.226177	-0.0196218	-0.152573	-0.0391182	-0.0682905	-0.0634475	-0.0554467	-0.0670003	0.0638763	-0.0979842	0.176343	-0.10848	0.315368	-0.0586811	0.306961	0.0241793	0.166146	0.0108553	0.221335	0.0129235	0.209146	-0.00660016	0.0422235	0.0364673	0.0385688	0.0304854	0.0127825	0.0232387	0.00575239	0.013463	0.0440705	0.0171523	0.101923
Deielia phaon 01	0.313375	0.0598959	0.039327	0.0602192	-0.191525	0.0731492	-0.260479	0.0598959	-0.282044	0.0446861	-0.292906	0.0259546	-0.271683	-0.0132352	-0.240327	-0.0287087	-0.216713	-0.0408136	-0.147155	-0.0637048	-0.0776301	-0.0776897	-0.0578948	-0.0787105	0.0479867	-0.0975441	0.140028	-0.116156	0.279323	-0.0724071	0.315876	0.0221692	0.1722	0.0276219	0.224141	0.0180095	0.216647	0.00701896	0.0454177	0.0440737	0.0383402	0.0315775	0.0273837	0.0301654	0.0101239	0.0216588	0.0544432	0.0272817	0.113743
Deielia phaon 02	0.310689	0.063024	0.0419835	0.0576003	-0.177328	0.0816447	-0.25126	0.0681076	-0.283721	0.0420115	-0.293857	0.0157082	-0.270027	-0.0119646	-0.240852	-0.0241676	-0.221352	-0.0327902	-0.144255	-0.0585113	-0.0843903	-0.0761144	-0.0673082	-0.0827709	0.0472818	-0.111122	0.149582	-0.113416	0.289394	-0.0455205	0.32106	0.0240663	0.171437	0.0168985	0.224704	0.0188501	0.212957	-0.00185902	0.0434904	0.0387019	0.032302	0.0354796	0.0124944	0.0256073	0.00805672	0.0142193	0.0570419	0.0204556	0.111875
Deielia phaon 03	0.313002	0.0571734	0.0457493	0.0651762	-0.180748	0.0896874	-0.253399	0.0758305	-0.28841	0.0480855	-0.29721	0.0230068	-0.274595	-0.0109358	-0.238361	-0.0280377	-0.216482	-0.039974	-0.139361	-0.0692031	-0.0756195	-0.0853855	-0.0633506	-0.0899323	0.0413559	-0.116449	0.153657	-0.118892	0.265858	-0.0359679	0.319579	0.0334348	0.170076	0.0160451	0.221304	0.0158298	0.211532	-0.00487536	0.0466546	0.0422118	0.0398379	0.0360632	0.0195289	0.0257458	0.0146426	0.0153933	0.0552254	0.0206052	0.109534
Deielia phaon 04	0.306071	0.0588605	0.0449338	0.0641382	-0.177014	0.089588	-0.246336	0.0789651	-0.280919	0.0542763	-0.293633	0.0244285	-0.271946	-0.00806051	-0.241474	-0.0290345	-0.222025	-0.0408124	-0.149914	-0.0700925	-0.0789202	-0.0915241	-0.0644484	-0.0978404	0.0499434	-0.118165	0.161524	-0.119095	0.279603	-0.0326455	0.310207	0.0288631	0.172129	0.0189606	0.223009	0.0171148	0.213903	-0.00303086	0.0452407	0.0422336	0.0381786	0.0346655	0.0153786	0.0244122	0.00963208	0.0162699	0.0521213	0.0224718	0.104756
Deielia phaon 05	0.312176	0.0546174	0.0458408	0.0649721	-0.196005	0.0869727	-0.260731	0.0712625	-0.287717	0.0457756	-0.294171	0.0227658	-0.264474	-0.0135166	-0.233885	-0.0274243	-0.209334	-0.0406958	-0.147027	-0.064173	-0.0682716	-0.0793089	-0.0577363	-0.0853644	0.0490179	-0.114074	0.153963	-0.117072	0.287996	-0.0468136	0.321009	0.0248683	0.163717	0.0143316	0.2187	0.0146442	0.205	-0.0099223	0.045251	0.0460458	0.0394502	0.040246	0.0123071	0.0306504	0.00494856	0.0204966	0.0524953	0.0244013	0.10748
Deielia phaon 06	0.306087	0.061884	0.0486007	0.0596328	-0.174986	0.082324	-0.245384	0.0696561	-0.27812	0.0432696	-0.290377	0.0151237	-0.272063	-0.0149859	-0.241884	-0.0287804	-0.22032	-0.0368126	-0.165253	-0.0563578	-0.0844916	-0.0782226	-0.0778162	-0.0815779	0.0350505	-0.115685	0.147025	-0.117156	0.288318	-0.0298712	0.318235	0.0275993	0.175408	0.0161135	0.225759	0.0181818	0.214048	-0.000788301	0.0494029	0.0384395	0.040583	0.0341098	0.0180212	0.0246598	0.00985195	0.014104	0.0601425	0.0196968	0.114162
Deielia phaon 07	0.311821	0.0534915	0.0426305	0.0645827	-0.179006	0.0884437	-0.248062	0.0748659	-0.28214	0.0482694	-0.290789	0.0235525	-0.268831	-0.0128457	-0.237956	-0.030148	-0.221002	-0.0381742	-0.14453	-0.0687603	-0.0831396	-0.0889108	-0.066721	-0.0949742	0.0360701	-0.119219	0.149743	-0.126153	0.28177	-0.0249429	0.316734	0.0269933	0.173889	0.0202687	0.221624	0.0176922	0.211814	-0.0035453	0.0445981	0.0442402	0.0348743	0.0373677	0.0152474	0.0273702	0.0123944	0.0177334	0.0573616	0.0245247	0.111606
Deielia phaon 08	0.304367	0.0558324	0.0473651	0.0651142	-0.172486	0.0918788	-0.245842	0.0805074	-0.286568	0.049171	-0.293064	0.0239395	-0.266958	-0.00928167	-0.236391	-0.0280616	-0.223192	-0.034113	-0.153308	-0.0648526	-0.0752158	-0.092192	-0.0603702	-0.0999585	0.0471448	-0.132802	0.144653	-0.134766	0.297741	-0.0192465	0.313219	0.0343954	0.159445	0.0184551	0.21596	0.0186619	0.205409	-0.000836775	0.0456579	0.0438227	0.0392598	0.0334569	0.0174663	0.023603	0.0123789	0.0181891	0.0521494	0.022097	0.11118
Deielia phaon 09	0.293001	0.0598977	0.0442123	0.0679031	-0.179293	0.0919714	-0.245893	0.0793177	-0.279532	0.0526818	-0.288368	0.022927	-0.272592	-0.006358	-0.240016	-0.0319317	-0.223282	-0.0416223	-0.155549	-0.0692697	-0.0756536	-0.0955547	-0.0625705	-0.100068	0.0382854	-0.126962	0.157887	-0.123024	0.289036	-0.0452834	0.304363	0.0313761	0.174122	0.0223914	0.220932	0.0208228	0.215084	0.00157909	0.0463028	0.0471965	0.0384242	0.037036	0.01708	0.0260535	0.0141557	0.0164316	0.0589044	0.0235017	0.11096
Deielia phaon 10	0.303133	0.0570421	0.0506189	0.0663038	-0.184217	0.090289	-0.252601	0.0741667	-0.283196	0.0492957	-0.295634	0.0236483	-0.275524	-0.0115224	-0.236352	-0.0321358	-0.22017	-0.0415659	-0.154409	-0.0667757	-0.0766177	-0.0892186	-0.063222	-0.0945706	0.0581529	-0.120375	0.140024	-0.116635	0.284637	-0.0385375	0.308721	0.0217432	0.168117	0.0199077	0.216591	0.018299	0.209596	-0.000982755	0.0527948	0.045453	0.0425165	0.0377962	0.0202075	0.0273724	0.0130475	0.0184053	0.0587164	0.0246204	0.115069
Deielia phaon 11	0.30287	0.0603798	0.0386368	0.0679354	-0.177391	0.0947449	-0.243983	0.0787833	-0.2779	0.0522912	-0.285539	0.0246146	-0.271707	-0.00675618	-0.240256	-0.0301192	-0.21932	-0.0413596	-0.14895	-0.0720347	-0.0815102	-0.0942637	-0.064904	-0.100908	0.0530806	-0.13062	0.16273	-0.13147	0.288919	-0.0466668	0.303716	0.0324934	0.176255	0.0204323	0.217357	0.0195558	0.212245	0.000957867	0.0449212	0.0474043	0.0354991	0.0369841	0.0128615	0.0282863	0.00692494	0.0205479	0.0547485	0.0299955	0.100695
Deielia phaon 12	0.319643	0.0584708	0.0432726	0.0611916	-0.179403	0.0869998	-0.246115	0.0738844	-0.277751	0.0465828	-0.286457	0.0218728	-0.271173	-0.00637683	-0.235668	-0.0279974	-0.214134	-0.0362952	-0.161213	-0.0587672	-0.0773217	-0.0842911	-0.0606623	-0.0910409	0.0457986	-0.120384	0.162222	-0.12241	0.290477	-0.0286426	0.319721	0.0303276	0.166531	0.0153962	0.223271	0.015494	0.210669	-0.00364269	0.0461554	0.0405289	0.0361493	0.0344338	0.00331619	0.0229664	-0.00510795	0.0148235	0.0492129	0.0212274	0.0985668
Deielia phaon 13	0.301791	0.0596332	0.0405359	0.0666456	-0.178405	0.0922372	-0.246201	0.0808757	-0.278056	0.0550553	-0.290885	0.0261212	-0.270743	-0.010435	-0.238401	-0.029707	-0.216079	-0.0413442	-0.159111	-0.068205	-0.0704085	-0.0946928	-0.0581737	-0.0999435	0.0527595	-0.124293	0.170123	-0.122285	0.290362	-0.0515803	0.308405	0.027563	0.166224	0.0218869	0.220357	0.0197986	0.211003	0.0011089	0.0432247	0.0468883	0.0355899	0.0368686	0.00909746	0.0253634	0.0045549	0.0185149	0.0508613	0.0260293	0.101575
Deielia phaon 14	0.323586	0.0459982	0.0416011	0.0626101	-0.188976	0.0863689	-0.254866	0.0721894	-0.282346	0.0486129	-0.296231	0.0133143	-0.27587	-0.0167416	-0.235285	-0.0308151	-0.218579	-0.0380493	-0.142029	-0.0606949	-0.0743751	-0.0785542	-0.059845	-0.0811118	0.0435897	-0.104196	0.15514	-0.100453	0.290074	-0.0335488	0.317993	0.0169117	0.16423	0.013243	0.21938	0.0134013	0.209061	-0.00827097	0.0422549	0.0420215	0.035319	0.0373228	0.0162133	0.0271578	0.00768045	0.0166156	0.0553681	0.0216391	0.106912
Deielia phaon 15	0.306852	0.0657525	0.0538583	0.0660922	-0.169759	0.0773879	-0.238834	0.064051	-0.276096	0.0418428	-0.290305	0.0186923	-0.271547	-0.0139152	-0.243819	-0.0279771	-0.227868	-0.0349041	-0.152645	-0.060997	-0.0808884	-0.0853321	-0.0669641	-0.0919579	0.0366991	-0.118966	0.156669	-0.131004	0.280463	-0.0616091	0.320716	0.0280746	0.171336	0.0233635	0.220983	0.0230229	0.212687	0.000649848	0.0499319	0.0480393	0.034967	0.0448802	0.00808164	0.033968	0.00645514	0.0230278	0.0484804	0.0271335	0.110546
Orthetrum testaceus 01	0.296677	0.0593557	0.0474104	0.0588592	-0.17732	0.074531	-0.248696	0.0593557	-0.278299	0.0410559	-0.292973	0.013952	-0.280537	-0.00782784	-0.242991	-0.0271717	-0.231661	-0.032286	-0.153809	-0.0583535	-0.0761337	-0.0767771	-0.0660466	-0.0794913	0.0613089	-0.11233	0.160456	-0.111607	0.29846	-0.0589897	0.304446	0.0360219	0.17592	0.0229983	0.222094	0.0217834	0.215778	0.00649796	0.0465598	0.0396168	0.0383808	0.0334867	0.0154026	0.0259837	0.00682272	0.017054	0.0493536	0.0214397	0.109396
Orthetrum testaceus 02	0.289404	0.0623253	0.0445179	0.0577501	-0.175903	0.0767207	-0.250325	0.0636569	-0.280468	0.0400944	-0.288745	0.0187371	-0.27434	-0.00523384	-0.245902	-0.0221828	-0.232949	-0.0274499	-0.157024	-0.0571405	-0.0677581	-0.0783034	-0.0580282	-0.0826678	0.0554724	-0.115766	0.171134	-0.124286	0.311588	-0.043343	0.306338	0.0389574	0.173742	0.0203796	0.220337	0.019791	0.209349	0.00280027	0.0468424	0.0395886	0.0399628	0.0305959	0.0124357	0.0226964	0.00649008	0.0125895	0.0435209	0.0170732	0.100307
Orthetrum testaceus 03	0.291888	0.0592242	0.0454246	0.0595262	-0.175964	0.0762204	-0.250466	0.0617831	-0.277719	0.0421157	-0.290016	0.0169646	-0.272107	-0.0118553	-0.242251	-0.0271189	-0.231404	-0.0315311	-0.157174	-0.0573775	-0.0783142	-0.0786142	-0.0658499	-0.0827989	0.0421386	-0.114123	0.168721	-0.113473	0.309364	-0.0415706	0.305642	0.0317992	0.173024	0.0177648	0.223296	0.0215367	0.215952	0.00104083	0.0484324	0.0404863	0.0420893	0.0339862	0.0119045	0.0257821	0.0020436	0.0161481	0.0518548	0.0208449	0.10949
Orthetrum testaceus 04	0.280406	0.0572956	0.0447122	0.0599596	-0.184727	0.0776585	-0.253692	0.0652482	-0.286217	0.0445788	-0.298389	0.0142148	-0.276689	-0.0103037	-0.242544	-0.0266571	-0.231497	-0.030333	-0.146683	-0.0587177	-0.0634759	-0.0776921	-0.0527887	-0.0807581	0.0636472	-0.112024	0.167565	-0.11845	0.302633	-0.0570098	0.308437	0.0284561	0.170519	0.0217279	0.217304	0.0199009	0.213084	0.00754652	0.0481966	0.0417927	0.0420462	0.0343825	0.0150263	0.0258394	0.00801615	0.0170999	0.0505052	0.0222745	0.104602
Orthetrum testaceus 05	0.299732	0.0569741	0.0458922	0.0587809	-0.178599	0.0741386	-0.250996	0.0555174	-0.27849	0.0335121	-0.28856	0.00794527	-0.274488	-0.0152628	-0.246265	-0.02614	-0.230909	-0.0324344	-0.150771	-0.0542412	-0.0806949	-0.0698051	-0.0702383	-0.0739383	0.0474619	-0.103374	0.149869	-0.112804	0.309472	-0.0630423	0.30535	0.0319121	0.174692	0.0219732	0.227595	0.0230227	0.216933	0.00598687	0.0473216	0.0413613	0.0422997	0.034501	0.0173909	0.0263596	0.00762333	0.0191369	0.0490524	0.0238855	0.109327
Orthetrum testaceus 06	0.282169	0.063485	0.0496002	0.056537	-0.178541	0.0783448	-0.253806	0.0637909	-0.279963	0.0435293	-0.293438	0.0180351	-0.277739	-0.00764613	-0.242004	-0.0232668	-0.231139	-0.0275138	-0.159192	-0.0541927	-0.0715503	-0.0803316	-0.0591335	-0.0851853	0.0636435	-0.117213	0.173735	-0.117787	0.308548	-0.0593443	0.288308	0.0381689	0.177526	0.0235974	0.219443	0.0241415	0.219074	0.008939	0.0500063	0.0382103	0.0433187	0.0304329	0.0145365	0.021589	0.00379609	0.011542	0.0476668	0.0193739	0.105134
Orthetrum testaceus 07	0.297269	0.0622744	0.0490356	0.0572506	-0.182555	0.0738423	-0.252849	0.0612677	-0.280127	0.0416446	-0.29247	0.0157089	-0.276975	-0.00827113	-0.244219	-0.0236686	-0.232319	-0.0281804	-0.155687	-0.0557363	-0.0718401	-0.0774529	-0.0617311	-0.0806899	0.0521994	-0.109426	0.171824	-0.110193	0.303585	-0.0544757	0.301239	0.0324648	0.170778	0.0233144	0.219288	0.0217104	0.211811	0.00994144	0.0513345	0.0379847	0.0446873	0.0294033	0.0145442	0.0211736	0.00745169	0.0139886	0.0512151	0.0181012	0.10451
Pantala flavescens 01	0.288467	0.0686405	0.0541577	0.0561607	-0.189302	0.0748998	-0.228045	0.0686405	-0.274539	0.0489518	-0.289214	0.0211453	-0.278481	0.00437197	-0.255015	-0.0129757	-0.234948	-0.0235564	-0.158265	-0.0531592	-0.0707358	-0.080534	-0.0646894	-0.0833239	0.0287364	-0.120013	0.128543	-0.137238	0.275612	-0.101858	0.294709	0.0426699	0.19224	0.0253265	0.229947	0.0251223	0.228142	0.00742485	0.0578763	0.0410554	0.0498382	0.0321009	0.028383	0.0267377	0.0199885	0.0169165	0.0509241	0.021928	0.115671
Pantala flavescens 02	0.291453	0.0655416	0.0486076	0.0572273	-0.194009	0.0731859	-0.226533	0.0655003	-0.270801	0.042117	-0.285109	0.0227406	-0.276153	0.00434315	-0.252142	-0.0112198	-0.224988	-0.022877	-0.158162	-0.0498305	-0.0721707	-0.0810209	-0.0665033	-0.0832061	0.0256318	-0.114391	0.129333	-0.128744	0.284396	-0.112255	0.312619	0.0493968	0.19176	0.0220124	0.229755	0.0222249	0.227911	0.00172731	0.0529545	0.0403614	0.0442739	0.033882	0.018849	0.0275126	0.0142237	0.0195516	0.0470028	0.0238633	0.107802
Pantala flavescens 03	0.284589	0.0604416	0.0524818	0.0601063	-0.194731	0.0758971	-0.23268	0.0692357	-0.277314	0.0458339	-0.291764	0.0208785	-0.272479	-0.000721621	-0.252883	-0.0134779	-0.228074	-0.0247451	-0.152401	-0.0550448	-0.0739225	-0.0797296	-0.0684122	-0.0808045	0.0325851	-0.120791	0.14183	-0.141925	0.257443	-0.109253	0.306207	0.0414235	0.193818	0.0252827	0.228597	0.0253683	0.229517	0.00861867	0.0588296	0.0451873	0.0462786	0.0361662	0.0293741	0.0308248	0.023317	0.0215394	0.0507731	0.0255006	0.109019
Pantala flavescens 04	0.283751	0.068143	0.0548542	0.0592617	-0.191982	0.078277	-0.228163	0.0691699	-0.266819	0.0502628	-0.291305	0.021702	-0.280012	0.00172093	-0.254322	-0.0140593	-0.235153	-0.0228541	-0.173901	-0.0517667	-0.0671019	-0.0842365	-0.0619103	-0.0855296	0.0476903	-0.125483	0.150289	-0.143555	0.242263	-0.0985694	0.292042	0.0387646	0.197483	0.0229745	0.232273	0.0247938	0.235819	0.00538475	0.0573061	0.0451978	0.0465021	0.0360812	0.027231	0.0300913	0.0191885	0.0180305	0.0480794	0.0221842	0.1159
Pantala flavescens 05	0.285502	0.0585076	0.0533543	0.058763	-0.201673	0.0766062	-0.234791	0.0703675	-0.272493	0.0516605	-0.292062	0.024724	-0.275833	0.0012512	-0.250738	-0.014466	-0.232342	-0.0232457	-0.160527	-0.050422	-0.0688807	-0.0823113	-0.0645459	-0.0840242	0.0473675	-0.126908	0.139421	-0.135617	0.26555	-0.099093	0.29741	0.0375659	0.189138	0.0236439	0.22926	0.0248493	0.225997	0.00990256	0.0582583	0.0428545	0.0493734	0.0340081	0.029623	0.0278076	0.0215468	0.0184013	0.053531	0.0222048	0.108553
Pantala flavescens 06	0.291678	0.0660828	0.0511824	0.0558126	-0.194919	0.073089	-0.230274	0.0665004	-0.269151	0.0465353	-0.285419	0.0222699	-0.269816	-0.000240505	-0.254393	-0.0111132	-0.235411	-0.0211239	-0.163642	-0.0513127	-0.0690479	-0.078368	-0.0658255	-0.0806909	0.0324337	-0.11455	0.13611	-0.134441	0.274855	-0.107382	0.307558	0.0436174	0.193272	0.0236563	0.230486	0.0222942	0.228568	0.00604769	0.0537011	0.0402857	0.045773	0.033024	0.0230674	0.0256416	0.0153267	0.0189793	0.0473472	0.0233197	0.10654
Pantala flavescens 07	0.287506	0.068079	0.0523779	0.0596367	-0.185696	0.0741266	-0.222067	0.0689373	-0.268483	0.0471765	-0.286216	0.0239195	-0.273647	0.000669341	-0.252828	-0.0121971	-0.229847	-0.0237498	-0.168	-0.0515492	-0.0745959	-0.0830656	-0.0701591	-0.0853449	0.021934	-0.1248	0.130468	-0.145049	0.281245	-0.0969343	0.310254	0.0502802	0.188154	0.0208711	0.22874	0.0234937	0.225491	0.00442798	0.0555313	0.0411343	0.0461	0.0337101	0.0254997	0.026917	0.0175564	0.0201987	0.0498835	0.0246097	0.110774
Pantala flavescens 08	0.283623	0.065738	0.0604279	0.0550108	-0.192497	0.0748594	-0.23055	0.0690589	-0.277125	0.0480606	-0.29479	0.0229654	-0.278851	0.000831714	-0.248632	-0.0135981	-0.228273	-0.0220361	-0.156183	-0.0587812	-0.0708477	-0.0841267	-0.0634412	-0.0874815	0.0212376	-0.104377	0.124436	-0.125806	0.281308	-0.119804	0.292994	0.0436003	0.196142	0.0279761	0.22869	0.0257876	0.232094	0.0103416	0.0603446	0.0393302	0.0491768	0.0348132	0.0285371	0.0279075	0.0206626	0.0173946	0.0508002	0.0223999	0.110717
Pantala flavescens 09	0.288766	0.0603559	0.0492697	0.0580738	-0.197804	0.074585	-0.233172	0.0681483	-0.271632	0.0447979	-0.283284	0.0209372	-0.268845	-0.000972497	-0.245991	-0.0150985	-0.231235	-0.0223011	-0.16403	-0.050263	-0.0733756	-0.0775953	-0.0685258	-0.0790505	0.0327857	-0.113149	0.135165	-0.133558	0.292288	-0.116869	0.298975	0.0379978	0.190071	0.0265322	0.229512	0.02276	0.228032	0.00813778	0.0523124	0.0422269	0.0433278	0.0360679	0.0245224	0.0302125	0.0149073	0.0210709	0.0457886	0.0235674	0.112171
Trithemis aurora 01	0.312518	0.0644155	0.0307912	0.0577319	-0.19881	0.0774736	-0.244966	0.0644155	-0.26999	0.0444507	-0.277788	0.018236	-0.261589	-0.00420197	-0.240172	-0.0164259	-0.227181	-0.0224426	-0.147498	-0.0541187	-0.0639588	-0.0799577	-0.0552506	-0.0853648	0.0561996	-0.123377	0.157941	-0.132784	0.314659	-0.0744956	0.304906	0.0428125	0.176731	0.0251953	0.225811	0.0271495	0.218857	0.00639389	0.0348467	0.0406523	0.0282158	0.0325551	0.00233961	0.0224248	-8.83e-06	0.013718	0.0361743	0.0209361	0.0872242
Trithemis aurora 02	0.294354	0.0676039	0.0434987	0.0618613	-0.204207	0.0746499	-0.254005	0.0617402	-0.280252	0.0346903	-0.285033	0.0182669	-0.264821	-0.00252298	-0.242312	-0.014041	-0.226792	-0.0223094	-0.144438	-0.0541035	-0.0637636	-0.0780184	-0.0538645	-0.0841287	0.0508483	-0.119888	0.159388	-0.13694	0.311365	-0.073319	0.296587	0.035284	0.177859	0.0233038	0.221308	0.0244449	0.212751	0.00306575	0.046472	0.0420252	0.0392325	0.0350871	0.0149423	0.0269824	0.00687476	0.0176604	0.0455307	0.0233434	0.0984773
Trithemis aurora 03	0.304674	0.0543751	0.0375974	0.0593953	-0.20085	0.0697686	-0.248717	0.0572118	-0.270579	0.0395577	-0.280295	0.0162957	-0.266353	-0.00723107	-0.243213	-0.0198552	-0.236791	-0.023038	-0.159766	-0.0532184	-0.0686062	-0.076345	-0.0539464	-0.0827867	0.0572493	-0.114401	0.159698	-0.120158	0.302905	-0.0831999	0.300337	0.0378062	0.17795	0.0283774	0.227281	0.0237576	0.219052	0.00990116	0.0437564	0.0412934	0.0357565	0.0328895	0.0136254	0.0261713	0.0112459	0.0215372	0.0442366	0.0267072	0.0937531
Trithemis aurora 04	0.303938	0.0666392	0.0364242	0.0624702	-0.199067	0.0720859	-0.250186	0.0573039	-0.277621	0.0299474	-0.279981	0.00838823	-0.265412	-0.00612176	-0.239526	-0.0183197	-0.22598	-0.0224266	-0.147376	-0.0513029	-0.0637156	-0.0744036	-0.0548246	-0.0777951	0.0405662	-0.109847	0.145275	-0.130105	0.30189	-0.0893575	0.314516	0.0401136	0.185176	0.0210283	0.23242	0.0253257	0.217499	0.00653062	0.0416381	0.0452278	0.0349964	0.0376703	0.0103595	0.0293036	0.00354835	0.018317	0.043379	0.0239917	0.092063
Trithemis aurora 05	0.303714	0.0655506	0.0414308	0.0631245	-0.195923	0.0689252	-0.247315	0.0539713	-0.271357	0.033624	-0.280601	0.0119187	-0.269407	-0.00691456	-0.24769	-0.017296	-0.230969	-0.0212868	-0.160611	-0.0428988	-0.064335	-0.0778798	-0.0544076	-0.0845967	0.0604567	-0.120895	0.159909	-0.133857	0.277741	-0.0931743	0.31563	0.0501366	0.176028	0.0247627	0.226046	0.0264348	0.21452	0.00546327	0.0439117	0.0438189	0.0398074	0.0377101	0.0167765	0.0291244	0.00891447	0.0199429	0.0407032	0.0248316	0.0970267
Trithemis aurora 06	0.308872	0.0697437	0.0333577	0.0570636	-0.199365	0.0738842	-0.243417	0.0671451	-0.274489	0.0480818	-0.284341	0.0255936	-0.270094	0.00275847	-0.239175	-0.0164032	-0.225422	-0.0243431	-0.146647	-0.0601311	-0.0597684	-0.0884925	-0.0493269	-0.0920459	0.0583046	-0.120819	0.153662	-0.129537	0.305017	-0.0739498	0.309426	0.0392504	0.170412	0.0293128	0.222796	0.0297213	0.211875	0.0117859	0.0367956	0.0378155	0.0345151	0.0291139	0.00997574	0.020591	-0.00325113	0.00992008	0.0432125	0.0186662	0.0970774
Trithemis aurora 07	0.297428	0.0680803	0.0328544	0.064103	-0.203985	0.0816507	-0.25182	0.0657732	-0.273866	0.0430517	-0.279757	0.0177988	-0.262502	-0.00512175	-0.241469	-0.0174569	-0.228208	-0.0260024	-0.147456	-0.05592	-0.0592384	-0.0807062	-0.0494099	-0.0814597	0.0624119	-0.123721	0.178773	-0.135532	0.300751	-0.0959071	0.305285	0.0445874	0.167834	0.0213588	0.220662	0.0249899	0.21271	0.00955323	0.0379306	0.0450059	0.0306525	0.0333961	0.0100204	0.0271447	0.00782414	0.019328	0.0422747	0.0233032	0.0902975
Trithemis aurora 08	0.308688	0.0734534	0.0414572	0.0654921	-0.208225	0.0720806	-0.252193	0.0566949	-0.276974	0.0358554	-0.284796	0.0167144	-0.26665	-0.00733631	-0.236828	-0.022815	-0.229131	-0.0273664	-0.14172	-0.0578528	-0.0646247	-0.079336	-0.0545334	-0.0825804	0.0581896	-0.116948	0.152057	-0.128944	0.269756	-0.116696	0.309199	0.0477175	0.174084	0.0276876	0.225224	0.0290543	0.212665	0.0100062	0.0451461	0.0464639	0.039898	0.0377658	0.0160331	0.0290943	0.00881459	0.0234814	0.0495448	0.0291142	0.104918
Trithemis aurora 09	0.291325	0.0679382	0.0392146	0.0651917	-0.191614	0.0760456	-0.245376	0.0595248	-0.272394	0.0358706	-0.279488	0.0135249	-0.270641	-0.000819567	-0.246174	-0.0167298	-0.227569	-0.0233151	-0.148506	-0.0558795	-0.070569	-0.0813011	-0.0562296	-0.0863624	0.052116	-0.121268	0.157424	-0.136888	0.308842	-0.0874162	0.309813	0.0481582	0.172594	0.0247132	0.225618	0.0250135	0.211926	0.00272652	0.0414624	0.0439515	0.0352197	0.0371121	0.0135073	0.0285678	0.00474502	0.0191355	0.0445003	0.0246658	0.100254
Trithemis aurora 10	0.309495	0.0606194	0.0375971	0.0612697	-0.196938	0.0716164	-0.241428	0.0607898	-0.272038	0.039993	-0.283349	0.01147	-0.268822	-0.00683376	-0.241134	-0.0194248	-0.230539	-0.0260349	-0.154786	-0.0535611	-0.0659112	-0.0786967	-0.0559086	-0.0824857	0.0538431	-0.117594	0.149014	-0.128885	0.309214	-0.0834215	0.306259	0.0374764	0.174409	0.0270638	0.22142	0.0259001	0.214586	0.00936539	0.041787	0.0448433	0.0333214	0.0360669	0.00995224	0.0263667	0.00634964	0.018981	0.0458467	0.0272848	0.0977608
Trithemis aurora 11	0.301224	0.0692333	0.0354911	0.0619333	-0.192124	0.0764784	-0.241748	0.0646951	-0.275756	0.0402966	-0.282564	0.0192492	-0.267487	-0.00391117	-0.246365	-0.016109	-0.233344	-0.0228569	-0.140059	-0.0604768	-0.0638527	-0.0819159	-0.0551661	-0.0856501	0.0569589	-0.118595	0.161204	-0.131988	0.309582	-0.0857413	0.31056	0.0449692	0.169124	0.0224063	0.221089	0.0253428	0.210164	0.0057022	0.0405092	0.042976	0.0320799	0.0351272	0.0114815	0.0253055	0.00511095	0.0167533	0.0401118	0.0205047	0.0937781
Trithemis aurora 12	0.299295	0.0670966	0.0407461	0.0607373	-0.200797	0.0728917	-0.250348	0.0586235	-0.273911	0.0382105	-0.281745	0.0154549	-0.264223	-0.00346881	-0.24657	-0.0127385	-0.234741	-0.0179251	-0.149537	-0.0511114	-0.061681	-0.0793069	-0.0517695	-0.083502	0.0561851	-0.118586	0.159714	-0.136514	0.311243	-0.0805429	0.307186	0.047934	0.170301	0.0184884	0.216672	0.0243933	0.207613	0.00341507	0.0419631	0.0415229	0.0368651	0.0341511	0.016594	0.0261894	0.0120059	0.016624	0.041356	0.0218219	0.0975815
Trithemis aurora 13	0.303704	0.0625361	0.0338122	0.0622601	-0.194096	0.0715052	-0.240232	0.0595595	-0.266305	0.0424096	-0.276566	0.015967	-0.263679	-0.00317158	-0.246008	-0.0149132	-0.233405	-0.0220106	-0.156193	-0.0546701	-0.0693249	-0.0822273	-0.0615952	-0.0870302	0.0469968	-0.125569	0.156704	-0.139791	0.317893	-0.0692395	0.305668	0.0450508	0.174201	0.0248321	0.219916	0.0241107	0.213992	0.00876572	0.040356	0.0431657	0.0315394	0.0353412	0.0109352	0.0258814	0.00769719	0.0163883	0.045196	0.0235049	0.0987937
Acisoma panorpoides 01	0.298159	0.0715447	0.0481353	0.0675415	-0.168999	0.0856272	-0.244282	0.0715447	-0.279092	0.0485597	-0.299118	0.0195418	-0.280411	-0.0229048	-0.232332	-0.041327	-0.220071	-0.0478493	-0.141723	-0.0792484	-0.0803283	-0.0961344	-0.0610031	-0.101286	0.0369187	-0.112132	0.142131	-0.117376	0.319735	-0.0153743	0.313786	0.0368779	0.155448	0.0244836	0.212799	0.0230443	0.196396	0.0104372	0.0502136	0.0433359	0.0468168	0.0311578	0.0131894	0.0209685	-0.000156153	0.0141905	0.0591755	0.024131	0.114614
Acisoma panorpoides 02	0.303727	0.0532889	0.0516235	0.0763145	-0.182726	0.0824849	-0.256847	0.062227	-0.278705	0.0420485	-0.292995	0.009986	-0.276393	-0.0271334	-0.234032	-0.0406931	-0.220684	-0.0464752	-0.15321	-0.0711936	-0.0705074	-0.0917282	-0.0531138	-0.0961887	0.0589762	-0.115159	0.141692	-0.113958	0.315264	-0.0292123	0.31055	0.0227219	0.150714	0.0289953	0.207201	0.0205763	0.195791	0.00631298	0.0532283	0.0536579	0.043035	0.0441383	0.0130151	0.0295917	0.00671801	0.016208	0.0554575	0.029493	0.112221
Acisoma panorpoides 03	0.303487	0.0729125	0.0454084	0.0748775	-0.172389	0.0903075	-0.247556	0.0716768	-0.273363	0.0473024	-0.287534	0.0150567	-0.271233	-0.028262	-0.231018	-0.0419833	-0.218348	-0.0492635	-0.152031	-0.0721722	-0.0800796	-0.0910321	-0.0604433	-0.0989853	0.0476149	-0.124869	0.157654	-0.119728	0.318594	-0.0248385	0.315799	0.0341657	0.152398	0.0206847	0.210871	0.0234501	0.203008	0.00221988	0.0458143	0.0487839	0.0374116	0.0371171	0.00273536	0.0282322	-0.00298091	0.016184	0.0487269	0.0254966	0.107453
Acisoma panorpoides 04	0.307039	0.0742901	0.0376338	0.0648537	-0.169109	0.0911719	-0.247372	0.0723657	-0.274811	0.0510713	-0.29374	0.0126663	-0.273123	-0.0263932	-0.227285	-0.044004	-0.2151	-0.0478673	-0.151176	-0.0655569	-0.0773446	-0.0897042	-0.0635325	-0.0965648	0.0550857	-0.113866	0.164851	-0.115212	0.318777	-0.0320597	0.323434	0.040506	0.146281	0.0173078	0.212058	0.026233	0.199116	0.000390011	0.0453045	0.0432133	0.036689	0.0362093	0.0042755	0.0244378	-0.00739749	0.0130582	0.0468524	0.0221301	0.102593
Acisoma panorpoides 05	0.294659	0.074791	0.0429723	0.0660395	-0.168861	0.0793199	-0.242244	0.0722135	-0.276436	0.0516386	-0.300557	0.0251938	-0.28855	-0.0189712	-0.236786	-0.0438015	-0.222888	-0.0501216	-0.149364	-0.0735586	-0.0670315	-0.0918094	-0.0476546	-0.0988473	0.0599973	-0.117807	0.155735	-0.112964	0.309743	-0.0278614	0.314699	0.0372946	0.157131	0.0202527	0.210225	0.0235236	0.200672	0.00641906	0.0455803	0.0434049	0.0419701	0.0326291	0.00982116	0.0225751	-0.00352005	0.0155795	0.0522957	0.0251918	0.108392
Acisoma panorpoides 06	0.313835	0.0655178	0.049567	0.0701365	-0.174154	0.0846264	-0.250954	0.0626864	-0.278164	0.037048	-0.291899	0.0102054	-0.279361	-0.0336037	-0.234135	-0.0426554	-0.221745	-0.044389	-0.151783	-0.0617623	-0.0743153	-0.0840602	-0.0597877	-0.0879714	0.0430199	-0.111584	0.146563	-0.114167	0.311852	-0.0315577	0.315717	0.0358327	0.154271	0.0184568	0.213142	0.0265391	0.197289	0.0040315	0.0509691	0.0469288	0.0427832	0.0367562	0.0130378	0.0284026	0.00268436	0.0171714	0.0518368	0.0242654	0.10973
Acisoma panorpoides 07	0.302691	0.0747046	0.0419141	0.0665976	-0.17163	0.0789888	-0.24795	0.0632962	-0.277923	0.0415789	-0.293832	0.0098369	-0.273404	-0.0261164	-0.230494	-0.0388663	-0.218031	-0.0415109	-0.157201	-0.0622252	-0.0774258	-0.0869392	-0.0639099	-0.0933067	0.0455422	-0.118293	0.148632	-0.11735	0.315658	-0.0304603	0.322418	0.0373056	0.152142	0.0199953	0.215566	0.0271189	0.203334	2.16e-05	0.0489316	0.0457067	0.0438537	0.0381704	0.00850997	0.0263721	0.00183521	0.0144329	0.0537577	0.027662	0.107015
Acisoma panorpoides 08	0.302085	0.0740722	0.045971	0.0712488	-0.173316	0.0888836	-0.248944	0.0712547	-0.278351	0.0462442	-0.295059	0.0127361	-0.271632	-0.0328253	-0.232003	-0.0437825	-0.222391	-0.0473228	-0.156725	-0.0720545	-0.073555	-0.0897696	-0.0575515	-0.0962097	0.0432572	-0.119876	0.15349	-0.118449	0.310172	-0.0304265	0.315849	0.0304323	0.155669	0.020839	0.211485	0.026662	0.196226	0.00499171	0.0501214	0.0484337	0.0432762	0.0367639	0.0159929	0.0278914	0.00766326	0.020589	0.0548451	0.0266809	0.103426
Acisoma panorpoides 09	0.299795	0.0864824	0.049857	0.0664965	-0.170859	0.0886713	-0.251032	0.0718751	-0.280521	0.0583423	-0.304984	0.022189	-0.278052	-0.0224747	-0.227517	-0.0442508	-0.216456	-0.0511866	-0.148154	-0.0775199	-0.0725396	-0.0979129	-0.054234	-0.101462	0.0484896	-0.121037	0.143459	-0.124563	0.300514	-0.0413085	0.310707	0.0545073	0.150818	0.0188585	0.207363	0.0311669	0.198504	0.00533496	0.054869	0.0433653	0.0459711	0.0354226	0.0180818	0.024403	0.00812199	0.0149549	0.0584297	0.023339	0.109369
Tramea virginia 01	0.262366	0.0681934	0.0457931	0.0575857	-0.230387	0.0767231	-0.261696	0.0681934	-0.291734	0.0518008	-0.305348	0.0297371	-0.26713	-0.00581359	-0.217061	-0.0215561	-0.210485	-0.0246061	-0.142856	-0.0514127	-0.053711	-0.0739069	-0.0479925	-0.077481	0.0864634	-0.117251	0.180493	-0.139705	0.301424	-0.120391	0.278401	0.0255664	0.170885	0.0244641	0.214735	0.0243602	0.212511	0.00807831	0.0477547	0.0424872	0.0426397	0.0354344	0.0192176	0.0323134	0.0124584	0.0224888	0.0464996	0.0271902	0.106759
Tramea virginia 02	0.26164	0.0724725	0.0433022	0.0592082	-0.22723	0.0807985	-0.258965	0.0718894	-0.288686	0.0542922	-0.301544	0.032366	-0.270925	-0.00283363	-0.215209	-0.022322	-0.210242	-0.0257742	-0.126549	-0.0593233	-0.0556338	-0.0795372	-0.0496296	-0.0822606	0.0636643	-0.126623	0.164608	-0.1602	0.313158	-0.0985964	0.289662	0.0353239	0.165014	0.0244789	0.216567	0.0261766	0.209625	0.00685746	0.0470523	0.0410793	0.0402658	0.0349475	0.0238954	0.0306355	0.0160164	0.0220007	0.0489164	0.0275755	0.101228
Tramea virginia 03	0.262889	0.0729595	0.0468321	0.0582326	-0.229154	0.0781807	-0.260667	0.0698409	-0.289802	0.0535432	-0.302475	0.0310115	-0.268882	-0.00407892	-0.217253	-0.0228847	-0.212787	-0.0268705	-0.132413	-0.0605394	-0.0541254	-0.08053	-0.0504517	-0.082788	0.0647135	-0.118336	0.167325	-0.149973	0.307184	-0.114058	0.280441	0.0298679	0.169097	0.0293302	0.214946	0.0254576	0.213321	0.00925646	0.0478517	0.0443397	0.0414368	0.0364993	0.0255442	0.0299709	0.020109	0.0238817	0.0526725	0.0286585	0.103648
Tramea virginia 04	0.263569	0.0655684	0.0431703	0.0560804	-0.233318	0.0842478	-0.26544	0.0771651	-0.295244	0.0609292	-0.306399	0.0420891	-0.259723	-0.00413673	-0.213254	-0.0228613	-0.208635	-0.0253332	-0.131898	-0.0584171	-0.0525363	-0.0824562	-0.0467148	-0.086905	0.0804926	-0.118131	0.180564	-0.150834	0.308224	-0.0812943	0.288185	0.0380185	0.16262	0.0182383	0.211542	0.0168518	0.209324	-0.00332239	0.0450143	0.0401379	0.0396841	0.0324259	0.0210768	0.0282835	0.0146075	0.0186596	0.0469869	0.0226483	0.0981027
Tramea virginia 05	0.259126	0.0686584	0.0460142	0.059691	-0.234772	0.0795214	-0.264405	0.0726703	-0.296315	0.0518483	-0.304181	0.0290731	-0.262923	-0.00618621	-0.217047	-0.0193197	-0.211719	-0.0210426	-0.12913	-0.0488028	-0.0471915	-0.0754257	-0.0414413	-0.0801054	0.0673655	-0.121971	0.174582	-0.151229	0.315473	-0.0949437	0.283032	0.0234269	0.164861	0.020001	0.213468	0.0202534	0.212978	0.00157103	0.048416	0.0430227	0.0430864	0.0362978	0.0193346	0.0321426	0.0097802	0.0190826	0.0496479	0.0254447	0.101961
Tramea virginia 06	0.261631	0.0625602	0.047568	0.0519101	-0.230478	0.0781373	-0.257383	0.0720012	-0.287996	0.0538764	-0.300487	0.034202	-0.271725	0.000783866	-0.222934	-0.019038	-0.218039	-0.0228295	-0.14347	-0.0532247	-0.0555811	-0.0767498	-0.0482815	-0.0808441	0.0835621	-0.121872	0.183529	-0.150338	0.305014	-0.0835784	0.278911	0.0291227	0.169895	0.0225823	0.213684	0.021219	0.213492	0.00805502	0.0499897	0.0381726	0.0430994	0.0300041	0.0198648	0.0278017	0.011532	0.0198148	0.0498576	0.0254895	0.104745
Tramea virginia 07	0.254553	0.0639361	0.0436232	0.0549651	-0.235851	0.0791665	-0.264555	0.0738227	-0.293029	0.0559529	-0.306403	0.0320697	-0.272911	0.00130106	-0.214051	-0.0174319	-0.20891	-0.0213151	-0.129565	-0.0499305	-0.0494794	-0.0743234	-0.0413408	-0.0790172	0.0841593	-0.119231	0.185465	-0.153464	0.313143	-0.090778	0.276683	0.0298075	0.167111	0.0197989	0.212875	0.0192425	0.215061	0.0026495	0.0455222	0.0390932	0.0400933	0.0309122	0.0199093	0.0270434	0.0102155	0.0203375	0.0464552	0.0229197	0.101225
Orthetrum albistylum 01	0.297803	0.06492	0.0459126	0.0542694	-0.183041	0.0737069	-0.239577	0.06492	-0.269462	0.0505945	-0.291072	0.0318653	-0.279616	-0.010916	-0.245022	-0.024468	-0.23503	-0.02847	-0.158118	-0.0568464	-0.0725394	-0.0793014	-0.0644142	-0.0822911	0.036958	-0.112644	0.139605	-0.11399	0.276784	-0.0809979	0.316584	0.0438656	0.184642	0.0190711	0.230188	0.0210309	0.225768	0.000436157	0.0485922	0.0377804	0.0416167	0.0319831	0.0201513	0.0269622	0.0120099	0.017632	0.0514726	0.0204328	0.109803
Orthetrum albistylum 02	0.318593	0.0590774	0.0481577	0.0591238	-0.186262	0.0731683	-0.241678	0.0619551	-0.271152	0.0437099	-0.291415	0.0198128	-0.279233	-0.0136066	-0.243801	-0.0256983	-0.232274	-0.0301259	-0.165249	-0.0529311	-0.0724475	-0.0754472	-0.0644878	-0.0776114	0.0469484	-0.107911	0.144125	-0.116557	0.244899	-0.102855	0.320036	0.0470972	0.177909	0.0222064	0.22714	0.021853	0.216096	0.00490294	0.0511768	0.0421983	0.0419578	0.0352513	0.025105	0.0290108	0.0179095	0.0232814	0.0541959	0.0252728	0.113751
Orthetrum albistylum 03	0.324158	0.0617865	0.0375066	0.0523447	-0.197369	0.0675359	-0.250873	0.0557514	-0.277975	0.0385785	-0.293259	0.0172642	-0.264026	-0.00705504	-0.232044	-0.0135267	-0.224069	-0.01627	-0.154794	-0.0420117	-0.0720397	-0.0662092	-0.0655127	-0.0692148	0.0520158	-0.0987801	0.165633	-0.111704	0.264061	-0.0837066	0.32788	0.037932	0.178037	0.0113907	0.229666	0.0153575	0.224492	-0.00562137	0.037995	0.0347845	0.0295684	0.0317626	0.00995122	0.0261156	-3.28531e-05	0.0168291	0.0420113	0.0175641	0.10902
Orthetrum albistylum 04	0.295652	0.0607164	0.0512196	0.0555527	-0.191633	0.0775552	-0.249585	0.0669297	-0.274656	0.0521474	-0.293986	0.0332974	-0.282087	-0.0130005	-0.238787	-0.0321712	-0.226824	-0.0340351	-0.156971	-0.0539025	-0.0715045	-0.0794423	-0.0625058	-0.0822562	0.0442146	-0.11217	0.145714	-0.118027	0.263362	-0.0943578	0.306094	0.0445102	0.182457	0.0222202	0.228426	0.0197988	0.222742	0.00478233	0.0547773	0.0407088	0.0468845	0.0322116	0.0195371	0.0275257	0.0148454	0.0232631	0.0553483	0.0261074	0.117264
Orthetrum albistylum 05	0.315257	0.0590291	0.0483403	0.0564086	-0.191418	0.0719	-0.24843	0.0616582	-0.279112	0.0421589	-0.294611	0.0244005	-0.274032	-0.0106731	-0.23293	-0.0242998	-0.226826	-0.0250024	-0.148396	-0.0515988	-0.0785885	-0.072199	-0.0705028	-0.075854	0.0404241	-0.109207	0.147161	-0.118588	0.264406	-0.0824358	0.316941	0.0409331	0.181303	0.0176696	0.230298	0.0202028	0.219087	-0.00171853	0.049453	0.0389065	0.0417896	0.0343957	0.0151679	0.0288007	0.00945716	0.0198815	0.0529242	0.0228147	0.112837
Orthetrum albistylum 06	0.310401	0.0651528	0.0457804	0.0566419	-0.188896	0.0726728	-0.244151	0.063625	-0.277465	0.0442054	-0.292659	0.0233481	-0.275386	-0.0104964	-0.241718	-0.0219606	-0.232838	-0.0269806	-0.156783	-0.0535676	-0.0743094	-0.0760786	-0.0671925	-0.0802036	0.0351306	-0.104775	0.145237	-0.113511	0.269655	-0.0846518	0.312689	0.0389166	0.178906	0.0191613	0.230294	0.0189139	0.219456	-0.00142589	0.0497561	0.0394421	0.0430053	0.031185	0.0293452	0.0276297	0.0197423	0.0201383	0.0514242	0.0230728	0.110574
Orthetrum albistylum 07	0.302601	0.0463306	0.0429425	0.0497716	-0.196595	0.0715291	-0.248061	0.0610128	-0.283784	0.0411279	-0.293206	0.0300343	-0.275504	-0.00719603	-0.242897	-0.0202403	-0.228002	-0.025109	-0.153441	-0.0513551	-0.071571	-0.0712912	-0.0646853	-0.0743796	0.0491425	-0.103919	0.156649	-0.112996	0.287459	-0.069719	0.308025	0.030633	0.179173	0.0206149	0.22597	0.015177	0.219444	0.00325851	0.0478176	0.0369856	0.0404941	0.0293022	0.0191037	0.024999	0.0176497	0.0225324	0.052593	0.024729	0.108681
Orthetrum albistylum 08	0.307323	0.0606739	0.0465269	0.0622982	-0.188169	0.0775047	-0.24712	0.0662338	-0.279152	0.0456155	-0.294995	0.0249572	-0.277537	-0.0133067	-0.239804	-0.0262754	-0.228401	-0.0301307	-0.150823	-0.0541846	-0.0699819	-0.0765408	-0.0619863	-0.0804024	0.0493425	-0.110666	0.142273	-0.114955	0.267181	-0.0946559	0.310373	0.0382185	0.178676	0.0176244	0.228739	0.0199035	0.221094	-0.000339993	0.0487724	0.0426137	0.0388468	0.035805	0.0216577	0.0309328	0.0139697	0.0211914	0.0508497	0.0249025	0.112344
Orthetrum melania 01	0.280552	0.0636006	0.0426163	0.0557179	-0.195645	0.0724821	-0.253581	0.0636006	-0.285853	0.0486071	-0.300742	0.030251	-0.28525	-0.00631136	-0.243364	-0.026223	-0.230283	-0.031424	-0.153645	-0.059668	-0.052067	-0.0846423	-0.0424449	-0.0871352	0.0733403	-0.110891	0.162729	-0.120225	0.258315	-0.0939853	0.294243	0.0356254	0.181657	0.0261383	0.225309	0.0249625	0.220378	0.0121468	0.0475982	0.0430856	0.0405404	0.0321631	0.0276471	0.0279871	0.0176909	0.0227146	0.0546954	0.0272207	0.115561
Orthetrum melania 03	0.286014	0.0628516	0.0420884	0.0564589	-0.192071	0.0710619	-0.253582	0.0631336	-0.284986	0.0443346	-0.297751	0.0194438	-0.272665	-0.00979365	-0.243565	-0.0200655	-0.231089	-0.0254434	-0.15626	-0.0520193	-0.0603231	-0.0820663	-0.0523418	-0.085452	0.0604747	-0.11691	0.163922	-0.113715	0.272616	-0.0807016	0.300111	0.0353816	0.178828	0.020536	0.231724	0.0220038	0.222213	0.00449109	0.0443519	0.041936	0.0383497	0.0352844	0.0241071	0.0296738	0.0157687	0.0210046	0.0505146	0.0232759	0.11355
Orthetrum melania 04	0.294173	0.0696354	0.0459603	0.0594045	-0.190814	0.0723458	-0.244147	0.0624873	-0.275154	0.0408406	-0.287329	0.0240066	-0.271756	-0.0114952	-0.240291	-0.0293201	-0.230219	-0.032096	-0.166886	-0.0569702	-0.0758877	-0.0787327	-0.0691177	-0.0799984	0.055316	-0.110442	0.15413	-0.119454	0.280104	-0.0934387	0.314578	0.0356361	0.175059	0.0287082	0.22801	0.0275019	0.215301	0.014116	0.0462136	0.0434464	0.0425706	0.0333137	0.0262343	0.0260625	0.0174537	0.0187629	0.0453883	0.0221839	0.111109
Orthetrum melania 05	0.272073	0.0636312	0.0410762	0.0567126	-0.19674	0.0777631	-0.256576	0.0683226	-0.282279	0.0529203	-0.292899	0.0348258	-0.286847	-0.00602349	-0.248129	-0.0274783	-0.235008	-0.0321011	-0.156024	-0.0617476	-0.0419038	-0.0841664	-0.0305297	-0.088191	0.0725724	-0.115425	0.172118	-0.120362	0.274903	-0.0956987	0.285424	0.0345966	0.177178	0.027808	0.223751	0.0243535	0.220492	0.0114159	0.0469882	0.0416759	0.0399784	0.0318444	0.0241759	0.0274959	0.0192543	0.020723	0.0527217	0.0238376	0.104227
Orthetrum melania 06	0.285577	0.0669278	0.042671	0.0561119	-0.195946	0.07362	-0.25546	0.0641087	-0.283393	0.0430177	-0.297467	0.0212028	-0.280522	-0.00749164	-0.243198	-0.025005	-0.230207	-0.0295409	-0.156475	-0.0524938	-0.0594012	-0.0779483	-0.0519133	-0.0807596	0.0752812	-0.110023	0.162386	-0.114158	0.265048	-0.0933876	0.29921	0.0349232	0.177447	0.023254	0.229314	0.0236388	0.220317	0.00587512	0.0482029	0.0408828	0.0421957	0.0335419	0.0254938	0.027039	0.0179512	0.0192493	0.0523871	0.0236383	0.110502
Pseudothemis zonata 01	0.302721	0.064938	0.0363998	0.0602983	-0.179712	0.0728777	-0.232032	0.064938	-0.272663	0.0451842	-0.287876	0.0209335	-0.275816	-0.00461343	-0.25538	-0.0195434	-0.239274	-0.0285541	-0.1535	-0.0632771	-0.0642135	-0.086691	-0.0558431	-0.0884519	0.0527921	-0.114897	0.153333	-0.121873	0.281277	-0.094265	0.305371	0.0469932	0.181079	0.0264126	0.223951	0.0271738	0.222034	0.0122215	0.0396316	0.0415224	0.034408	0.0351089	0.0183332	0.0271983	0.0103097	0.0182555	0.0514715	0.0239123	0.103198
Pseudothemis zonata 02	0.30564	0.0709292	0.0345422	0.0584682	-0.18338	0.0679251	-0.241513	0.0562705	-0.280638	0.0355323	-0.286643	0.0164142	-0.273141	-0.00564137	-0.243539	-0.0162237	-0.232246	-0.0216699	-0.154745	-0.0482506	-0.0636714	-0.0713929	-0.0580048	-0.0774789	0.0527062	-0.107766	0.159079	-0.118286	0.286348	-0.100693	0.309129	0.0509119	0.185008	0.0194777	0.22988	0.0206785	0.222245	0.00301937	0.0397096	0.038391	0.0325243	0.033324	0.0149157	0.0266676	0.00420279	0.0169634	0.0379513	0.0205223	0.103639
Pseudothemis zonata 03	0.295585	0.0639084	0.0409805	0.0591999	-0.183153	0.0738067	-0.235744	0.0672647	-0.276961	0.0442214	-0.29043	0.0233674	-0.274833	-0.00861929	-0.256393	-0.0185348	-0.243513	-0.0264933	-0.147892	-0.0622547	-0.0667501	-0.0848687	-0.0592688	-0.0876823	0.0593539	-0.115619	0.140152	-0.118044	0.287936	-0.0742324	0.300629	0.0439281	0.183928	0.0216799	0.227819	0.0224523	0.220845	0.00622176	0.045533	0.0398731	0.0383871	0.0327152	0.0208192	0.0261616	0.010284	0.0156905	0.0569081	0.0233719	0.105779
Anotogaster sieboldii 01	0.300158	0.0551059	0.0527538	0.0528656	-0.169303	0.0633156	-0.222983	0.0551059	-0.250147	0.0418282	-0.272062	0.0215006	-0.273206	0.00171049	-0.260995	-0.00974844	-0.252226	-0.0147775	-0.175584	-0.0443228	-0.102003	-0.0651477	-0.0755198	-0.0738375	0.029056	-0.0984426	0.16181	-0.104467	0.302672	-0.0680656	0.311059	0.0186668	0.191261	0.0153986	0.23733	0.00967168	0.232666	-0.0121393	0.0511682	0.0376673	0.041569	0.0308719	-0.00378419	0.022225	-0.00889374	0.0179246	0.0426676	0.0187886	0.112538
Anotogaster sieboldii 02	0.304079	0.0414862	0.0534701	0.0571748	-0.176464	0.0632384	-0.230701	0.0493043	-0.257424	0.0351021	-0.275738	0.00995161	-0.273097	-0.00939973	-0.260164	-0.0193904	-0.251346	-0.0232517	-0.177727	-0.0360351	-0.0825408	-0.0570728	-0.0589531	-0.0619901	0.0212819	-0.0798282	0.144991	-0.0994654	0.28789	-0.0770386	0.307693	0.00379408	0.199119	0.014634	0.247484	0.00605143	0.239109	-0.014086	0.0514601	0.0434758	0.0447369	0.0378707	-0.00974437	0.0302487	-0.0178383	0.0255354	0.0498103	0.0272165	0.120611
Anotogaster sieboldii 03	0.304441	0.0596326	0.0528362	0.0490138	-0.162366	0.0587424	-0.222758	0.0517442	-0.252762	0.0399447	-0.272012	0.0227943	-0.269201	0.00183628	-0.254201	-0.0106296	-0.245267	-0.0173039	-0.198059	-0.0352883	-0.0899638	-0.0635371	-0.0668006	-0.0698819	0.0310369	-0.0916769	0.148234	-0.101065	0.296098	-0.0842582	0.320045	0.025161	0.195677	0.0163493	0.243659	0.0120977	0.236928	-0.00670845	0.0492498	0.0337922	0.0384393	0.0272302	-0.0183128	0.0208383	-0.0231114	0.0169781	0.045222	0.0171367	0.11295
[truncated: 4 more columns]
